# Supplementary material for: Association between exposure to the Chinese famine during infancy and the risk of self-reported chronic lung diseases in adulthood: a cross-sectional study
Source: PubMed Central journal article supplement — BMJ Open. 2017 Jun 2;7(5):e015476. doi: 10.1136/bmjopen-2016-015476 (PMC5623412; doi:10.1136/bmjopen-2016-015476), 2017-06-02
Supplement: bmjopen-2016-015476.draft_revisions.pdf [file bmjopen-2016-015476.draft_revisions.pdf]

# BMJ Open

## Association between the Chinese famine exposure during infant period and the risk of self-report chronic lung diseases in adulthood: a cross-sectional study

|                                 |                                                                                                                                                                                                                                                                                                                                                                                                                                                                                                                                                                                                                      |
|---------------------------------|----------------------------------------------------------------------------------------------------------------------------------------------------------------------------------------------------------------------------------------------------------------------------------------------------------------------------------------------------------------------------------------------------------------------------------------------------------------------------------------------------------------------------------------------------------------------------------------------------------------------|
| Journal:                        | <i>BMJ Open</i>                                                                                                                                                                                                                                                                                                                                                                                                                                                                                                                                                                                                      |
| Manuscript ID                   | bmjopen-2016-015476                                                                                                                                                                                                                                                                                                                                                                                                                                                                                                                                                                                                  |
| Article Type:                   | Research                                                                                                                                                                                                                                                                                                                                                                                                                                                                                                                                                                                                             |
| Date Submitted by the Author:   | 08-Dec-2016                                                                                                                                                                                                                                                                                                                                                                                                                                                                                                                                                                                                          |
| Complete List of Authors:       | Wang, Zhenghe; Peking University Health Science Centre, Institute of Child and Adolescent Health, School of Public Health;<br>Zou, Zhi-Yong; Peking University School of Public Health, Institute of Child and Adolescent Health<br>Yang, Zhongping; Peking University Health Science Centre, Institutional addresses: Institute of Child and Adolescent Health, School of Public Health<br>Dong, Yanhui; Peking University Health Science Centre, Institute of Child and Adolescent Health, School of Public Health,<br>Ma, Jun; Institute of Child and Adolescent Health, Peking University Health Science Center, |
| <b>Primary Subject Heading</b>: | Public health                                                                                                                                                                                                                                                                                                                                                                                                                                                                                                                                                                                                        |
| Secondary Subject Heading:      | Epidemiology, Respiratory medicine                                                                                                                                                                                                                                                                                                                                                                                                                                                                                                                                                                                   |
| Keywords:                       | Famine, Developmental Origins of Health and Disease, Chronic Lung Diseases, Infant                                                                                                                                                                                                                                                                                                                                                                                                                                                                                                                                   |
|                                 |                                                                                                                                                                                                                                                                                                                                                                                                                                                                                                                                                                                                                      |

SCHOLARONE™  
Manuscripts

1  
2  
3  
4 1 **Association between the Chinese famine exposure during**  
5  
6 2 **infant period and the risk of self-report chronic lung diseases**  
7  
8 3 **in adulthood: a cross-sectional study**

10  
11 4 Authors: Zhenghe Wang, Zhiyong Zou, Zhongping Yang, Yanhui Dong and Jun

12  
13 5 Ma\*

14  
15  
16 6 Institutional addresses: Institute of Child and Adolescent Health, School of  
17  
18 7 Public Health, Peking University Health Science Center, Beijing, 100191,  
19  
20  
21 8 China

22  
23  
24 9 Email address:

25  
26 10 Zhenghe Wang: [18993198804@163.com](mailto:18993198804@163.com)

27  
28 11 Zhiyong Zou: [harveyzou2002@bjmu.edu.cn](mailto:harveyzou2002@bjmu.edu.cn)

29  
30 12 Zhongping Yang: [benyoungsichuan@163.com](mailto:benyoungsichuan@163.com)

31  
32 13 Yanhui Dong: [18811508639@163.com](mailto:18811508639@163.com)

33  
34 14 Jun Ma: [majunt@bjmu.edu.cn](mailto:majunt@bjmu.edu.cn)

35  
36  
37  
38  
39 15 \* **Corresponding Authors:** Jun Ma, Ph.D., Professor, Institute of Child and  
40  
41 16 Adolescent Health, School of public health Peking University Health Science  
42  
43 17 Center, No 38 Xue Yuan Road, Haidian District, Beijing, 100191, China. Tel:  
44  
45 18 +86-10-82801624 Fax: +86-10-82801178, Email: [majunt@bjmu.edu.cn](mailto:majunt@bjmu.edu.cn).

## Abstract

**Objective** This study aimed to examine the associations between prenatal and early postnatal exposed to the Chinese famine and the risk of chronic lung diseases in adulthood.

**Design** Data analysis from a cross-sectional survey.

**Setting and participants** 2,603 subjects were enrolled into the study from the China Health and Retirement Longitudinal Study (CHARLS) 2011-2012 baseline survey to analyze the associations between prenatal and early postnatal famine exposure and the risk of chronic lung diseases in adulthood.

**Main outcome measures** Chronic lung diseases were defined based on the self-report information.

**Results** The prevalence of self-report chronic lung diseases in fetus-exposed, infant-exposed, preschool-exposed and non-exposed groups was 6.6%, 8.9%, 6.6% and 5.2%, respectively. The prevalence of chronic lung diseases for the infant-exposed group was significantly higher than the non-exposed group. The results of the multi-variance logistics regression analysis indicated that the risk of chronic lung diseases in the infant-exposed group was significantly higher (OR=1.96, 95% CI: 1.14-3.37) than the non-exposed group in severely affected areas, even after adjusting for gender, smoking status, and drinking status (OR=2.03, 95% CI: 1.17-3.52). In addition, after furthermore stratified by gender and famine severity, we found that only infant exposure to the severe

1  
2  
3  
4 40 famine was associated with the elevated risk of chronic lung diseases among  
5  
6 41 male adults (OR=2.34, 95% CI: 1.05-5.21).  
7  
8

9  
10 42 **Conclusions** severe famine exposure in infant period might increase the  
11  
12 43 risk of chronic lung diseases in male adults.  
13

#### 14 44 **Strengths and limitations of this study**

- 15  
16  
17  
18 45 ● This study evaluated the associations between prenatal and early  
19  
20 46 postnatal exposure to the Chinese famine and the risk of chronic lung  
21  
22 47 diseases in adulthood, which was unclear in previous studies.  
23  
24  
25  
26 48 ● The present study used the China Health and Retirement Longitudinal  
27  
28 49 Study 2011-2012 baseline survey which covered all geographical regions  
29  
30 50 in China and had broadly representative of entire China mainland found  
31  
32 51 that infant exposure to the severe Chinese famine increased the risk of  
33  
34 52 chronic pulmonary diseases in adulthood.  
35  
36  
37  
38  
39 53 ● Selection bias was unavoidable, because severe famine could eliminate  
40  
41 54 weaker participants, and remain the healthier participants, which may  
42  
43 55 decrease the real effect of famine exposure.  
44  
45  
46  
47  
48 56 ● Self-report information based on doctor diagnosis could lower the real  
49  
50 57 prevalence of chronic pulmonary diseases, and further underestimate the  
51  
52 58 effect of famine exposure.  
53  
54  
55  
56  
57  
58  
59  
60

1  
2  
3  
4 59 **Key words:** Famine; Developmental Origins of Health and Disease;  
5  
6 60 Chronic Lung Diseases; Infant  
7  
8

## 9 61 **Introduction**

10  
11  
12 62 The chronic lung diseases briefly include chronic obstructive lung diseases  
13  
14 63 (COPDs), chronic bronchitis, bronchial asthma, and lung heart disease  
15  
16  
17 64 (excluding lung tumors and cancer). Global Status Report on NCDs showed  
18  
19  
20 65 that respiratory diseases, including asthma and chronic obstructive lung  
21  
22 66 diseases were the third leading cause of NCDs deaths in 2012 (about 4.0  
23  
24  
25 67 million) [1]. Especially in the developing countries, the burden of chronic lung  
26  
27 68 diseases was heavier than in the developed countries [2].  
28  
29

30  
31 69 The Development of Health and Disease theory speculated that the fetus in  
32  
33 70 utero would change their growth rate to adapt the supply of nutrients and  
34  
35  
36 71 oxygen. However, several studies had found that these adaptive changes  
37  
38 72 might permanently modify the structure and physiological function of fetus  
39  
40  
41 73 body [3, 4]. The heavier lung diseases burden in the developing countries may  
42  
43 74 be associated with a higher prevalence of low birth weight than in the  
44  
45  
46 75 developed countries. Several studies had found that the low birth weight was a  
47  
48 76 strong factor to predict reduction of forced expiratory vital capacity and forced  
49  
50  
51 77 vital capacity[5-7]. Moreover, although some studies found that the low birth  
52  
53 78 weight increased the risk of asthma[8-12] and the mortality of chronic  
54  
55  
56 79 obstructive lung disease[7], no consistent results was observed in previous  
57  
58  
59  
60

1  
2  
3  
4 80 studies [13-16]. Due to ethical limitation, we cannot perform the similar  
5  
6 81 research in human beings, but natural historical famines provided us a unique  
7  
8 82 opportunity to examine the DOHaD hypothesis in human beings. The Dutch  
9  
10 83 famine happened in the west of the Netherlands at the end of the World War II  
11  
12 84 that lasted for about six months. Dutch famine study observed that  
13  
14 85 mid-gestation exposure to the famine increased the prevalence of obstructive  
15  
16 86 airways disease in adulthood[17]. Compared with the Dutch famine, the  
17  
18 87 Chinese famine happened in the east of Asia, starting in the end of 1950 and  
19  
20 88 ending in the early of 1960, which lasted for about three years. A majority of  
21  
22 89 studies have found that early-life exposure to the Chinese famine linked with  
23  
24 90 hypertension[18], diabetes[19], metabolic syndrome[20], but the associations  
25  
26 91 with chronic lung diseases are still unclear.  
27  
28  
29  
30  
31  
32  
33

34 92 In the current study, we used the public data of the China Health and  
35  
36 93 Retirement Longitudinal Study 2011-2012 baseline survey, to examine the  
37  
38 94 associations of varying degrees of famine exposure in early life and chronic  
39  
40 95 lung diseases in adulthood, and explore whether a gender difference exists.  
41  
42  
43  
44

## 45 96 **Methods**

### 47 97 **Sampling and participants**

48  
49 98 Sampling in the present study was based on a national population-based  
50  
51 99 longitudinal survey in 2011-2012 of China Health and Retirement Longitudinal  
52  
53 100 Study (CHARLS) [21]. A total of 17,708 adults aged above 45 years from  
54  
55  
56  
57  
58  
59  
60

1  
2  
3  
4 101 10,257 households were randomly selected to receive the household survey  
5  
6 102 among 150 counties, 28 provinces, and autonomous regions of China  
7  
8 103 mainland. 2,751 participants out of 17,708 adults were screened by birthdate  
9  
10 104 into the present study. Finally, 2,603 subjects were enrolled into our final  
11  
12 105 analysis after excluding 148 subjects with information missing of chronic lung  
13  
14 106 diseases.  
15  
16  
17  
18

### 19 **Sampling and grouping**

20  
21  
22 108 Participants were divided into the non-exposed group and three famine  
23  
24 109 exposed groups (fetus, infant, and preschool-exposed groups). The Chinese  
25  
26 110 famine began in January 1959 and ended in October 1961, and in order to  
27  
28 111 minimize the misclassification of the famine exposure, we defined the  
29  
30 112 participants who were born between October 1, 1962 and September 30, 1964  
31  
32 113 as the non-exposed group, participants born between October 1, 1959 and  
33  
34 114 September 30, 1961 as the fetal-exposed group, participants born between  
35  
36 115 January 1, 1958 and December 31, 1958 as the infant-exposed group, and  
37  
38 116 defined participants born between January 1, 1956 and December 31, 1957 as  
39  
40 117 the preschool-exposed group.  
41  
42  
43  
44  
45  
46  
47

### 48 **Famine severity**

49  
50  
51 119 Despite the Chinese famine affected the whole China mainland, the severity  
52  
53 120 was at different levels across provinces due to the difference of regional  
54  
55 121 climate, population density and local food policies. Similar to the previous  
56  
57  
58  
59  
60

1  
2  
3  
4 122 studies [18, 19], we also used the excess mortality during 1959-1961  
5  
6 123 compared with the 1956-1958 to evaluate of the severity of the famine in the  
7  
8  
9 124 present study, and 50% of the excess mortality was used as the threshold to  
10  
11 125 distinguish the severity of famine exposure. The regions with excess mortality  
12  
13 126  $\geq 50\%$  were categorized as the severe affected areas, and otherwise were  
14  
15  
16 127 divided to the less severe affected areas.

## 128 **Measurements**

### 129 **Diagnosis of chronic lung diseases**

130 In this study, data were collected through household survey by investigators  
131 who received unified training and passed the examination. The diagnosis of  
132 chronic lung diseases was based on the question of "Have you been  
133 diagnosed with chronic lung diseases, such as chronic bronchitis, emphysema  
134 (excluding tumors, or cancer) by a doctor? ". Subjects answering "Yes" were  
135 defined as persons suffering from chronic lung diseases, and subjects  
136 answering "No" as those who did not suffer from chronic lung diseases.

### 137 **Smoking and drinking**

138 The definition of smoking was based on the question of "Have you ever  
139 chewed tobacco, smoked a pipe, smoked self-rolled cigarettes, or smoked  
140 cigarettes/cigars (by smoking we mean smoking more than 100 cigarettes in  
141 life)? ". Subjects answering "Yes" were defined as smoker, and the other as  
142 nonsmoker. The definition of drinking was based on the question of "Did you



1  
2  
3  
4 143 drink any alcoholic beverages, such as beer, wine, or liquor in the past year? "

5  
6 144 Subjects with answers of "Drink more than once a month" or "Drink but less

7  
8  
9 145 than once a month" were defined as drinker, and "None of these" as

10  
11 146 nondrinker.

## 147 **Analysis**

148 Statistical analyses were performed using IBM SPSS 20.0 (IBM Corporation,

149 Armonk, NY, USA). Continuous and categorical variables were expressed as

150 mean  $\pm$  standard deviation and percentage (%), respectively.

151 The Chi square tests were used to compare the difference of chronic lung

152 diseases prevalence between the non-exposed group and famine exposed

153 groups.

154 Univariate and multivariate binary logistic regression models by maximum

155 likelihood method were used to examine the risk of chronic lung diseases

156 among the fetus, infant, and preschool-exposed groups, compared with the

157 non-exposed group, respectively. In multivariate logistic regression model, we

158 adjusted for sex, smoking, drinking. Interactions between famine exposure

159 groups (fetus, infant, or preschool vs. non-exposed) and area (severely

160 affected vs. less severely affected) were tested by adding a multiplicative

161 factor in the binary logistic regression model.

162 In order to explore whether there exists a gender difference, stratified analyses

163 by gender were performed using the same methods. Data were expressed as

1  
2  
3  
4 164 odds ratio (OR) (95% confidence interval).

5  
6  
7 165  $P < 0.05$  for two-sided was considered statistically significant for all the  
8  
9 166 analyses.

## 10 11 12 13 167 **Ethics**

14  
15  
16 168 Our study is a secondary analysis of the de-identified CHARLS public data.

17  
18 169 The Medical Ethics Committee of Peking University granted the current study  
19  
20  
21 170 exemption from review. All the subjects were informed and consented for the  
22  
23 171 protocol of study.

## 24 25 26 172 **Results**

27  
28  
29 173 The basic characteristics of participants were shown in **Table 1**. A total of  
30  
31  
32 174 2,603 participants were enrolled into the present study. The samples of the  
33  
34  
35 175 non-exposed, fetus, infant, and preschool-exposed groups were 695, 784, 530,  
36  
37 176 and 594, respectively. The prevalence of chronic lung diseases among the  
38  
39  
40 177 non-exposed, fetus, infant, and preschool exposed groups were 5.2%, 6.6%,  
41  
42 178 8.9%, and 6.6%, respectively. However, we did not observe a statistically  
43  
44  
45 179 significant difference of prevalence between famine exposed groups (fetus,  
46  
47 180 infant, and preschool) and the non-exposed group.

48  
49  
50 181 **Table 2** presents the risk of chronic lung diseases among fetus, infant, and  
51  
52  
53 182 preschool famine exposure groups compared with the non-exposed group.  
54  
55  
56 183 Compared with the non-exposed group, the infant-exposed group had a higher  
57  
58 184 risk of chronic lung diseases (OR=1.78; 95% CI: 1.14, 2.79), even after  
59  
60

1  
2  
3  
4 185 adjusting for gender, smoking, and drinking (OR=1.81; 95% CI: 1.15, 2.85). but  
5  
6 186 the consistent associations were not observed in fetus, and preschool-  
7  
8  
9 187 exposed groups.

10  
11  
12 188 Stratified analyses by famine severity were showed in **Table 3**. Compared with  
13  
14 189 the non-exposed group, only the prevalence of chronic lung diseases for the  
15  
16  
17 190 infant-exposed group was significantly higher in severely affected area (6.7%  
18  
19 191 vs. 10.1%). Stratified by severity of famine exposure, we found that people in  
20  
21  
22 192 the infant-exposed group were at a higher risk of chronic lung diseases than  
23  
24 193 the non-exposed group in severely affected area (OR=1.96; 95% CI: 1.14,  
25  
26  
27 194 3.37), even after adjusting for gender, smoking, and drinking (OR=2.03; 95%  
28  
29 195 CI: 1.17, 3.52). However, we did not observe the consistent associations in  
30  
31  
32 196 other famine exposed groups and in less severely affected area. We did not  
33  
34  
35 197 observe any significant interactions between famine exposure group (fetus,  
36  
37 198 infant, or preschool vs. non-exposed) and areas (severely affected vs. less  
38  
39 199 severely affected).

40  
41  
42 200 **Table 4** presents the results of stratified analysis by gender and famine  
43  
44  
45 201 severity. In males, we observed that the infant-exposed group (OR=2.34; 95%  
46  
47  
48 202 CI: 1.05, 5.21) significantly increased the risk of chronic lung diseases in  
49  
50  
51 203 severely affected area, compared with the non-exposed group. The consistent  
52  
53 204 associations were not observed in fetus and preschool-exposed groups and in  
54  
55 205 less severely affected area. In females, we did not observe any significant  
56  
57  
58 206 associations between famine exposed groups and the non-exposed group.  
59  
60

1  
2  
3  
4 207 Any significant interactions were not observed between famine exposed  
5  
6 208 groups (fetus, infant, or preschool vs. non-exposed) and areas (severely  
7  
8  
9 209 affected vs. less severely affected) neither males nor females.

## 210 **Discussion**

211 In the current study, we observed that the infant exposure to the Chinese  
212 famine significantly increased the risk of chronic lung diseases in later life.  
213 After stratifying by gender and famine severity, we found only the infant  
214 exposure to severe famine significantly increased the risk of chronic lung  
215 diseases in male adults, indicating that the infant period might be a critical  
216 period for human lung structure and function development.

217 Several mechanisms could explain the associations. 1) Early-life exposure to  
218 the severe famine might perpetually modify the bronchial reactivity during rapid  
219 growth. One Dutch famine study found that gestation the famine exposure  
220 affected neither the concentrations of total or specific IgE nor lung function  
221 values (FEV<sub>1</sub> and FVC), but they observed a significant associations between  
222 exposure to famine in mid and early gestation and obstructive airways disease  
223 in adulthood[17]. The results indicated that famine exposure might not change  
224 the lung function and atopic disease, but could permanently modify the  
225 bronchial responsiveness. Though we could not assure the assumption  
226 because bronchial reactivity was not measured in this study, this assumption  
227 can be one way to explain the mechanism. 2) Severe malnutrition during early

1  
2  
3  
4 228 life might increase susceptibility to pulmonary injury in later life. Animal model  
5  
6 229 study had found that young animals who were exposed to a low protein  
7  
8  
9 230 maternal diet in fetus were more likely to suffer pulmonary injury than  
10  
11 231 non-exposed young animals, which indicated the programming of the  
12  
13 232 antioxidant defenses and immune system[22]. Another animal study reported  
14  
15 233 fetuses exposed to a low protein diet significantly decreased the binding of  
16  
17  
18 234 dexamethasone to lung receptors[23].  
19

20  
21  
22 235 The present study further added the new direct evidence in human beings for  
23  
24 236 the fetus origin of diseases. To our knowledge, only one Dutch study explored  
25  
26  
27 237 the associations between the early-life famine exposure and atopy, lung  
28  
29 238 function, and obstructive airways disease, and found that the famine exposure  
30  
31 239 in mid and early gestation might significantly increase the prevalence of  
32  
33 240 obstructive airways disease. Results of the Dutch study were inconsistent with  
34  
35  
36 241 the current study. In this study, we found that only the severe famine exposure  
37  
38  
39 242 in infant stage significantly increased the risk of chronic lung diseases in  
40  
41 243 adulthood. Several reasons could explain the difference. Firstly, race might be  
42  
43 244 a main reason between the two studies. Subjects in the Dutch study came  
44  
45  
46 245 from White European, while subjects in this study were from Asian. Secondly,  
47  
48  
49 246 severity and duration could be another important discrepancy. The Dutch  
50  
51 247 famine only lasted for about six months, while the Chinese famine lasted for  
52  
53  
54 248 about three years. Furthermore, the Chinese famine led to approximately thirty  
55  
56  
57 249 millions premature death[24]. However, the mortality rate during famine period  
58  
59  
60

1  
2  
3  
4 250 (1945) was more than twice as high as that in 1939, and most of the excess  
5  
6 251 mortality was attributed to severe malnutrition[25].  
7  
8

9  
10 252 What was interesting is that we observed the severe famine exposure in infant  
11  
12 253 period significantly increased the risk of chronic lung diseases among men, but  
13  
14 254 not among women, which was contradictory to the severity of food shortage.

15  
16  
17 255 Chinese have held a profound and lasting tradition of “Preferring boys to girls”,  
18  
19 256 and thus boys may have been protected better against the famine by parents.

20  
21  
22 257 It was inconsistent with metabolic syndrome[26]. We speculated that boy’s  
23  
24 258 lungs development were more sensitive to severely malnutrition in early-life.

25  
26  
27 259 But the specific mechanisms need to be further explored in future study.  
28  
29

30 260 There are several limitations in this study. The primary limitation is the  
31  
32 261 selection bias. Severe famine could eliminate weaker participants, and remain  
33  
34

35 262 the healthier participants, which may decrease the real effect of famine  
36  
37 263 exposure. Secondly, similar to other the Chinese famine studies[18, 19, 27],  
38  
39

40 264 we also lacked the objective indicators that reflected the severity of famine  
41  
42 265 exposure, e.g. birth weight, birth body length. In addition, because both bad  
43  
44

45 266 weather and infection in early-life could increase the risk of chronic lung  
46  
47 267 diseases, we could not attribute all the excess mortality rate to the famine  
48  
49

50 268 exposure. Despite these limitations, the present study used the data of China  
51  
52 269 Health and Retirement Longitudinal Study 2011-2012 baseline survey that has  
53  
54

55 270 broad representative of entire China mainland, and found that infant exposure  
56  
57 271 to severe famine significantly increased the risk of chronic lung disease among  
58  
59  
60

1  
2  
3  
4 272 men.  
5  
6

## 7 273 **Conclusions**

8  
9  
10 274 Infant exposure to severe famine could increase the risk of chronic lung  
11  
12 275 diseases in male adults, indicating that the infant stage might be the critical  
13  
14 276 period of lungs development for men.  
15  
16

## 17 277 **Footnotes**

18  
19  
20  
21 278 **Contributors** JM and ZZ were co-investigators and designed the study, ZW,  
22  
23 279 ZY and YD carried out the initial analysis, and supervised data analysis. All  
24  
25 280 authors were involved in writing the paper and had final approval of the  
26  
27 281 submitted and published versions.  
28  
29  
30

31  
32 282 **Funding** This work was supported by National Science Foundation of China  
33  
34 283 (NSFC 81402692).  
35  
36

37 284 **Competing interests** The authors declared that they had no competing  
38  
39 285 interests.  
40  
41

42  
43 286 Our study is a secondary analysis of the de-identified CHARLS public data.  
44  
45 287 The Medical Ethics Committee of Peking University granted the current study  
46  
47 288 exemption from review. All the subjects were informed and consented for the  
48  
49 289 protocol of study.  
50

## 51 290 **Consent for publication**

52  
53  
54  
55  
56  
57 291 Not applicable.  
58  
59  
60

## 292 **Availability of data and material**

293 The datasets analyzed in the current study are available in the  
294 <http://charls.ccer.edu.cn/zh-CN/page/data/2011-charls-wave1>.

## 295 **Acknowledgements**

296 We would like to acknowledge the team of China Health and Retirement  
297 Longitudinal Study (CHARLS) 2011-2012 baseline survey. We are grateful to  
298 all the participants who participated in the baseline survey for their labor, and  
299 we also acknowledge all the subjects and households that participated in the  
300 survey for their cooperation.

## 301 **Reference**

- 302 1. Zhou M, Wang H, Zhu J, Chen W, Wang L, Liu S, et al. Cause-specific  
303 mortality for 240 causes in China during 1990-2013: a systematic subnational  
304 analysis for the Global Burden of Disease Study 2013. *Lancet*. 2016 Jan  
305 16;387(10015):251-72. doi: 10.1016/S0140-6736(15)00551-6.
- 306 2. Global Burden of Disease Study C. Global, regional, and national  
307 incidence, prevalence, and years lived with disability for 301 acute and chronic  
308 diseases and injuries in 188 countries, 1990-2013: a systematic analysis for  
309 the Global Burden of Disease Study 2013. *Lancet*. 2015 Aug  
310 22;386(9995):743-800. doi: 10.1016/S0140-6736(15)60692-4.
- 311 3. Li J, Na L, Ma H, Zhang Z, Li T, Lin L, et al. Multigenerational effects  
312 of parental prenatal exposure to famine on adult offspring cognitive function.  
313 *Scientific reports*. 2015;5:13792. doi: 10.1038/srep13792.
- 314 4. Wadhwa PD, Buss C, Entringer S, Swanson JM. Developmental  
315 origins of health and disease: brief history of the approach and current focus  
316 on epigenetic mechanisms. *Seminars in reproductive medicine*. 2009  
317 Sep;27(5):358-68. doi: 10.1055/s-0029-1237424.
- 318 5. Stein CE, Kumaran K, Fall CH, Shaheen SO, Osmond C, Barker DJ.  
319 Relation of fetal growth to adult lung function in south India. *Thorax*. 1997  
320 Oct;52(10):895-9.



- 1  
2  
3 321 6. Rona RJ, Gulliford MC, Chinn S. Effects of prematurity and  
4 322 intrauterine growth on respiratory health and lung function in childhood. *Bmj*.  
5 323 1993 Mar 27;306(6881):817-20.  
6  
7 324 7. Barker DJ, Godfrey KM, Fall C, Osmond C, Winter PD, Shaheen SO.  
8 325 Relation of birth weight and childhood respiratory infection to adult lung  
9 326 function and death from chronic obstructive airways disease. *Bmj*. 1991 Sep  
10 327 21;303(6804):671-5.  
11  
12 328 8. Shaheen SO, Sterne JA, Montgomery SM, Azima H. Birth weight,  
13 329 body mass index and asthma in young adults. *Thorax*. 1999  
14 330 May;54(5):396-402.  
15  
16 331 9. Slezak JA, Persky VW, Kviz FJ, Ramakrishnan V, Byers C. Asthma  
17 332 prevalence and risk factors in selected Head Start sites in Chicago. *The*  
18 333 *Journal of asthma : official journal of the Association for the Care of Asthma*.  
19 334 1998;35(2):203-12.  
20  
21 335 10. Schaubel D, Johansen H, Dutta M, Desmeules M, Becker A, Mao Y.  
22 336 Neonatal characteristics as risk factors for preschool asthma. *The Journal of*  
23 337 *asthma : official journal of the Association for the Care of Asthma*.  
24 338 1996;33(4):255-64.  
25  
26 339 11. Oliveti JF, Kercksmar CM, Redline S. Pre- and perinatal risk factors for  
27 340 asthma in inner city African-American children. *Am J Epidemiol*. 1996 Mar  
28 341 15;143(6):570-7.  
29  
30 342 12. Arshad SH, Stevens M, Hide DW. The effect of genetic and  
31 343 environmental factors on the prevalence of allergic disorders at the age of two  
32 344 years. *Clinical and experimental allergy : journal of the British Society for*  
33 345 *Allergy and Clinical Immunology*. 1993 Jun;23(6):504-11.  
34  
35 346 13. Shaheen SO, Sterne JA, Tucker JS, Florey CD. Birth weight,  
36 347 childhood lower respiratory tract infection, and adult lung function. *Thorax*.  
37 348 1998 Jul;53(7):549-53.  
38  
39 349 14. Sears MR, Holdaway MD, Flannery EM, Herbison GP, Silva PA.  
40 350 Parental and neonatal risk factors for atopy, airway hyper-responsiveness, and  
41 351 asthma. *Arch Dis Child*. 1996 Nov;75(5):392-8.  
42  
43 352 15. Matthes JW, Lewis PA, Davies DP, Bethel JA. Birth weight at term  
44 353 and lung function in adolescence: no evidence for a programmed effect. *Arch*  
45 354 *Dis Child*. 1995 Sep;73(3):231-4.  
46  
47 355 16. Kelly YJ, Brabin BJ, Milligan P, Heaf DP, Reid J, Pearson MG.  
48 356 Maternal asthma, premature birth, and the risk of respiratory morbidity in  
49 357 schoolchildren in Merseyside. *Thorax*. 1995 May;50(5):525-30.  
50  
51  
52  
53  
54  
55  
56  
57  
58  
59  
60

- 1  
2  
3 358 17. Lopuhaa CE, Roseboom TJ, Osmond C, Barker DJ, Ravelli AC,  
4 359 Bleker OP, et al. Atopy, lung function, and obstructive airways disease after  
5 360 prenatal exposure to famine. *Thorax*. 2000 Jul;55(7):555-61.  
6  
7 361 18. Li Y, Jaddoe VW, Qi L, He Y, Lai J, Wang J, et al. Exposure to the  
8 362 Chinese famine in early life and the risk of hypertension in adulthood. *Journal*  
9 363 *of hypertension*. 2011 Jun;29(6):1085-92. doi:  
10 364 10.1097/HJH.0b013e328345d969.  
11  
12 365 19. Li Y, He Y, Qi L, Jaddoe VW, Feskens EJ, Yang X, et al. Exposure to  
13 366 the Chinese famine in early life and the risk of hyperglycemia and type 2  
14 367 diabetes in adulthood. *Diabetes*. 2010 Oct;59(10):2400-6. doi:  
15 368 10.2337/db10-0385.  
16  
17 369 20. Li Y, Jaddoe VW, Qi L, He Y, Wang D, Lai J, et al. Exposure to the  
18 370 chinese famine in early life and the risk of metabolic syndrome in adulthood.  
19 371 *Diabetes Care*. 2011 Apr;34(4):1014-8. doi: 10.2337/dc10-2039.  
20  
21 372 21. Zhao Y, Hu Y, Smith JP, Strauss J, Yang G. Group profile: the China  
22 373 Health and Retirement Longitudinal Study (CHARLS). *International journal of*  
23 374 *epidemiology*. 2014;43(1):61-8.  
24  
25 375 22. Langlely-Evans SC, Phillips GJ, Jackson AA. Fetal exposure to low  
26 376 protein maternal diet alters the susceptibility of young adult rats to sulfur  
27 377 dioxide-induced lung injury. *J Nutr*. 1997 Feb;127(2):202-9.  
28  
29 378 23. Mulay S, Browne CA, Varma DR, Solomon S. Placental hormones,  
30 379 nutrition, and fetal development. *Federation proceedings*. 1980  
31 380 Feb;39(2):261-5.  
32  
33 381 24. Cai Y, Feng W. Famine, social disruption, and involuntary fetal loss:  
34 382 evidence from Chinese survey data. *Demography*. 2005 May;42(2):301-22.  
35  
36 383 25. Banning C. Food Shortage and Public Health, First Half of 1945.  
37 384 *Annals of the American Academy of Political & Socialence*.  
38 385 1946;245(2):93-110.  
39  
40 386 26. Zheng X, Wang Y, Ren W, Luo R, Zhang S, Zhang JH, et al. Risk of  
41 387 metabolic syndrome in adults exposed to the great Chinese famine during the  
42 388 fetal life and early childhood. *Eur J Clin Nutr*. 2012 Feb;66(2):231-6. doi:  
43 389 10.1038/ejcn.2011.161.  
44  
45 390 27. Wang Z, Li C, Yang Z, Zou Z, Ma J. Infant exposure to Chinese  
46 391 famine increased the risk of hypertension in adulthood: results from the China  
47 392 Health and Retirement Longitudinal Study. *BMC public health*. 2016;16(1):435.  
48 393 doi: 10.1186/s12889-016-3122-x.  
49 394  
50  
51  
52  
53  
54  
55  
56  
57  
58  
59  
60

395 **Table 1** Basic characteristics of study population according to the Chinese famine  
 396 exposure

|                                            | Non-exposed<br>group    | Fetus-exposed<br>group  | Infant-exposed<br>group | Preschool-exposed<br>group |
|--------------------------------------------|-------------------------|-------------------------|-------------------------|----------------------------|
| N                                          | 695                     | 784                     | 530                     | 594                        |
| Birth Group                                | 10/1/1962–<br>9/30/1964 | 10/1/1959–<br>9/30/1961 | 1958/1/1–<br>12/31/1958 | 1/1/1956–<br>12/31/1957    |
| Severely affected<br>area (%)              | 63.5                    | 62.1                    | 63.4                    | 63.3                       |
| Age in 2011(years)                         | 47~49                   | 50~51                   | 53                      | 54~55                      |
| Women (%)                                  | 53                      | 52                      | 48.1                    | 48.1                       |
| Smoking (%)                                | 35.9                    | 37.4                    | 41.4                    | 46.3 <sup>#</sup>          |
| Drinking (%)                               | 15.5                    | 16.5                    | 18.1                    | 18.7                       |
| Prevalence chronic<br>respiratory diseases | 5.2                     | 6.6                     | 8.9 <sup>#</sup>        | 6.6                        |

397 <sup>#</sup> Means Chi square tests *P* value <0.05 between preschool exposed group and the  
 398 non-exposed group.

**Table 2** The risk of Chronic lung diseases among three exposed groups compared with the non-exposed group.

|                                                               | Non-exposed | Fetus-exposed   | Infant-exposed  | Preschool-exposed |
|---------------------------------------------------------------|-------------|-----------------|-----------------|-------------------|
| Self-report prevalence of<br>Chronic respiratory diseases (%) | 5.2         | 6.6             | 8.9             | 6.6               |
| <i>P</i> <sup>a</sup>                                         |             | 0.240           | 0.012           | 0.290             |
| Odds ratio (95% CI) <sup>a</sup>                              | Ref.        | 1.30(0.84-2.02) | 1.78(1.14-2.79) | 1.29(0.81-2.05)   |
| <i>P</i> <sup>b</sup>                                         |             | 0.201           | 0.010           | 0.182             |
| Odds ratio (95% CI) <sup>b</sup>                              | Ref.        | 1.33(0.86-2.07) | 1.81(1.15-2.85) | 1.30(0.81-2.08)   |

<sup>a</sup> Single variance binary logistics regression model

<sup>b</sup> Multi-variance binary logistics regression model, adjusted for sex, smoking, drinking and family economic status.

399

**Table 3** Prevalence of Chronic respiratory diseases by birth group and severity of the Chinese famine area

|                                                              | Non-exposed | Fetus-exposed   | Infant-exposed  | Preschool-exposed |
|--------------------------------------------------------------|-------------|-----------------|-----------------|-------------------|
| Severely affected famine area                                |             |                 |                 |                   |
| Prevalence (%)                                               | 5.4         | 7.2             | 10.1            | 6.1               |
| <i>P</i> <sup>a</sup>                                        |             | 0.278           | 0.015           | 0.680             |
| Odds ratio (95% CI) <sup>a</sup>                             | Ref.        | 1.35(0.79-2.30) | 1.96(1.14-3.37) | 1.13(0.63-2.04)   |
| <i>P</i> <sup>b</sup>                                        |             | 0.232           | 0.012           | 0.630             |
| Odds ratio (95% CI) <sup>b</sup>                             | Ref.        | 1.39(0.81-2.40) | 2.03(1.17-3.52) | 1.16(0.64-2.11)   |
| Less severely affected famine area                           |             |                 |                 |                   |
| Prevalence (%)                                               | 4.7         | 5.7             | 6.7             | 7.3               |
| <i>P</i> <sup>a</sup>                                        |             | 0.601           | 0.369           | 0.234             |
| Odds ratio (95% CI) <sup>a</sup>                             | Ref.        | 1.22(0.57-2.61) | 1.45(0.65-3.25) | 1.60(0.74-3.46)   |
| <i>P</i> <sup>b</sup>                                        |             | 0.549           | 0.396           | 0.251             |
| Odds ratio (95% CI) <sup>b</sup>                             | Ref.        | 1.26(0.59-2.70) | 1.42(0.63-3.20) | 1.58(0.73-3.41)   |
| <i>P</i> for interaction between area and group <sup>a</sup> | Ref.        | 0.426           | 0.185           | 0.563             |
| <i>P</i> for interaction between area and group <sup>b</sup> | Ref.        | 0.469           | 0.179           | 0.546             |

<sup>a</sup> Single variance binary logistics regression model.

<sup>b</sup> Multi-variance binary logistics regression model, adjusted for sex, smoking, drinking and family economic status.

400

**Table 4** Prevalence rate of Chronic respiratory diseases by gender, birth group and severity of the Chinese famine area

| Variables                                               | Non-exposed groups | Fetus-exposed   | Infant-exposed  | Preschool-exposed |
|---------------------------------------------------------|--------------------|-----------------|-----------------|-------------------|
| <b>Female</b>                                           |                    |                 |                 |                   |
| Severely affected famine area                           |                    |                 |                 |                   |
| Prevalence (%)                                          | 5.9                | 7.7             | 9.4             | 8.7               |
| $P^a$                                                   |                    | 0.416           | 0.178           | 0.944             |
| Odds ratio (95% CI) <sup>a</sup>                        | Ref.               | 1.35(0.66-2.75) | 1.67(0.79-3.52) | 0.97(0.43-2.19)   |
| $P^b$                                                   |                    | 0.323           | 0.149           | 0.991             |
| Odds ratio (95% CI) <sup>b</sup>                        | Ref.               | 1.35(0.70-3.00) | 1.75(0.82-3.76) | 1.01(0.44-2.31)   |
| Less severely affected famine area                      |                    |                 |                 |                   |
| Prevalence (%)                                          | 3.9                | 5.0             | 3.5             | 5.7               |
| $P^a$                                                   |                    | 0.656           | 0.896           | 0.143             |
| Odds ratio (95% CI) <sup>a</sup>                        | Ref.               | 1.30(0.41-4.06) | 0.91(0.21-3.90) | 2.36(0.75-7.47)   |
| $P^b$                                                   |                    | 0.845           | 0.845           | 0.209             |
| Odds ratio (95% CI) <sup>b</sup>                        | Ref.               | 1.12(0.35-3.60) | 0.86(0.20-3.77) | 2.12(0.66-6.80)   |
| $P$ for interaction between area and group <sup>a</sup> | Ref.               | 0.957           | 0.465           | 0.217             |
| $P$ for interaction between area and group <sup>b</sup> | Ref.               | 0.82            | 0.437           | 0.255             |
| <b>Male</b>                                             |                    |                 |                 |                   |
| Severely affected famine area                           |                    |                 |                 |                   |
| Prevalence (%)                                          | 5.0                | 6.6             | 10.8            | 6.6               |
| $P^a$                                                   |                    | 0.453           | 0.038           | 0.499             |
| Odds ratio (95% CI) <sup>a</sup>                        | Ref.               | 1.37(0.61-3.08) | 2.34(1.05-5.21) | 1.35(0.57-3.20)   |
| $P^b$                                                   |                    | 0.455           | 0.038           | 0.499             |
| Odds ratio (95% CI) <sup>b</sup>                        | Ref.               | 1.36(0.60-3.08) | 2.34(1.05-5.21) | 1.35(0.57-3.20)   |
| Less severely affected famine area                      |                    |                 |                 |                   |
| Prevalence (%)                                          | 5.6                | 6.6             | 9.2             | 6.3               |
| $P^a$                                                   |                    | 0.732           | 0.298           | 0.802             |
| Odds ratio (95% CI) <sup>a</sup>                        | Ref.               | 1.20(0.43-3.31) | 1.70(0.63-4.64) | 1.14(0.40-3.25)   |
| $P^b$                                                   |                    | 0.698           | 0.268           | 0.791             |
| Odds ratio (95% CI) <sup>b</sup>                        | Ref.               | 1.22(0.44-3.40) | 1.77(0.65-4.86) | 1.15(0.40-3.23)   |
| $P$ for interaction between area and group <sup>a</sup> | Ref.               | 0.841           | 0.630           | 0.812             |
| $P$ for interaction between area and group <sup>b</sup> | Ref.               | 0.864           | 0.657           | 0.817             |

<sup>a</sup> Single variance binary logistics regression model

<sup>b</sup> multi-variance binary logistics regression model, adjusted smoking, drinking and family economic status.

402

For peer review only

1  
2  
3  
4  
5  
6  
7  
8  
9  
10  
11  
12  
13  
14  
15  
16  
17  
18  
19  
20  
21  
22  
23  
24  
25  
26  
27  
28  
29  
30  
31  
32  
33  
34  
35  
36  
37  
38  
39  
40  
41  
42  
43  
44  
45  
46  
47  
48  
49  
50  
51  
52  
53  
54  
55  
56  
57  
58  
59  
60

# BMJ Open

## Association between the Chinese famine exposure during infant period and the risk of self-report chronic lung diseases in adulthood: a cross-sectional study

|                                 |                                                                                                                                                                                                                                                                                                                                                                                                                                                                                                                                                                                                                      |
|---------------------------------|----------------------------------------------------------------------------------------------------------------------------------------------------------------------------------------------------------------------------------------------------------------------------------------------------------------------------------------------------------------------------------------------------------------------------------------------------------------------------------------------------------------------------------------------------------------------------------------------------------------------|
| Journal:                        | <i>BMJ Open</i>                                                                                                                                                                                                                                                                                                                                                                                                                                                                                                                                                                                                      |
| Manuscript ID                   | bmjopen-2016-015476.R1                                                                                                                                                                                                                                                                                                                                                                                                                                                                                                                                                                                               |
| Article Type:                   | Research                                                                                                                                                                                                                                                                                                                                                                                                                                                                                                                                                                                                             |
| Date Submitted by the Author:   | 21-Feb-2017                                                                                                                                                                                                                                                                                                                                                                                                                                                                                                                                                                                                          |
| Complete List of Authors:       | Wang, Zhenghe; Peking University Health Science Centre, Institute of Child and Adolescent Health, School of Public Health;<br>Zou, Zhi-Yong; Peking University School of Public Health, Institute of Child and Adolescent Health<br>Yang, Zhongping; Peking University Health Science Centre, Institutional addresses: Institute of Child and Adolescent Health, School of Public Health<br>Dong, Yanhui; Peking University Health Science Centre, Institute of Child and Adolescent Health, School of Public Health,<br>Ma, Jun; Institute of Child and Adolescent Health, Peking University Health Science Center, |
| <b>Primary Subject Heading</b>: | Public health                                                                                                                                                                                                                                                                                                                                                                                                                                                                                                                                                                                                        |
| Secondary Subject Heading:      | Epidemiology, Respiratory medicine                                                                                                                                                                                                                                                                                                                                                                                                                                                                                                                                                                                   |
| Keywords:                       | Famine, Developmental Origins of Health and Disease, Chronic Lung Diseases, Infant                                                                                                                                                                                                                                                                                                                                                                                                                                                                                                                                   |
|                                 |                                                                                                                                                                                                                                                                                                                                                                                                                                                                                                                                                                                                                      |

SCHOLARONE™  
Manuscripts



1  
2  
3  
4 1 **Association between the Chinese famine exposure during**  
5  
6 2 **infant period and the risk of self-report chronic lung diseases**  
7  
8 3 **in adulthood: a cross-sectional study**

10 4 Authors: Zhenghe Wang, Zhiyong Zou, Zhongping Yang, Yanhui Dong and Jun

13 5 Ma\*

16 6 Institutional addresses: Institute of Child and Adolescent Health, School of  
17  
18 7 Public Health, Peking University Health Science Center, Beijing, 100191,  
19  
20  
21 8 China

23 9 Email address:

26 10 Zhenghe Wang: [18993198804@163.com](mailto:18993198804@163.com)

29 11 Zhiyong Zou: [harveyzou2002@bjmu.edu.cn](mailto:harveyzou2002@bjmu.edu.cn)

32 12 Zhongping Yang: [benyoungsichuan@163.com](mailto:benyoungsichuan@163.com)

35 13 Yanhui Dong: [18811508639@163.com](mailto:18811508639@163.com)

38 14 Jun Ma: [majunt@bjmu.edu.cn](mailto:majunt@bjmu.edu.cn)

41 15 \* **Corresponding Authors:** Jun Ma, Ph.D., Professor, Institute of Child and  
42 16 Adolescent Health, School of public health Peking University Health Science  
43 17 Center, No 38 Xue Yuan Road, Haidian District, Beijing, 100191, China. Tel:  
44 18 +86-10-82801624 Fax: +86-10-82801178, Email: [majunt@bjmu.edu.cn](mailto:majunt@bjmu.edu.cn).

## Abstract

**Objective** This study aimed to examine the associations between early-life exposed to the Chinese famine and the risk of chronic lung diseases in adulthood.

**Design** Data analysis from a cross-sectional survey.

**Setting and participants** 4,135 subjects were enrolled into the study from the China Health and Retirement Longitudinal Study (CHARLS) 2011-2012 baseline survey to analyze the associations between prenatal and early postnatal famine exposure and the risk of chronic lung diseases in adulthood.

**Main outcome measures** Chronic lung diseases were defined based on the self-report information.

**Results** The prevalence of self-report chronic lung diseases in fetus-exposed, infant-exposed, preschool-exposed and non-exposed groups was 6.1%, 6.5%, 7.9% and 6.8%, respectively. The risk of chronic lung diseases in the infant-exposed group was significantly higher (OR=1.95, 95% CI: 1.10-3.44) than the non-exposed group in severely affected areas, even after adjusting for gender, smoking, and drinking, family economic status, and the highest education attainment of parents (OR=2.57, 95% CI: 1.26-5.25). In addition, after stratified by gender and famine severity, we found that only infant exposure to the severe famine was associated with the elevated risk of chronic lung diseases among male adults (OR=3.16, 95% CI: 1.17-8.51).

1  
2  
3  
4 40 **Conclusions** Severe famine exposure in infant period might increase the  
5  
6 41 risk of chronic lung diseases in male adults.  
7  
8

9  
10 42 **Strengths and limitations of this study**  
11

12  
13 43 ● This study evaluated the associations between prenatal and early  
14  
15 44 postnatal exposure to the Chinese famine and the risk of chronic lung  
16  
17 45 diseases in adulthood, which were unclear in previous studies.  
18

19  
20  
21 46 ● The present study using the China Health and Retirement Longitudinal  
22  
23 47 Study 2011-2012 baseline survey that covered all geographical regions in  
24  
25 48 China and had broadly representative of entire China mainland found  
26  
27 49 infant exposure to the severe Chinese famine increased the risk of chronic  
28  
29 50 lung diseases in male adults.  
30  
31

32  
33  
34 51 ● Selection bias was unavoidable, because severe famine could eliminate  
35  
36 52 the weaker participants, and remain the healthier participants, which may  
37  
38 53 decrease the real effects of famine exposure.  
39

40  
41  
42 54 ● Self-report prevalence based on doctor diagnosis could be lower than the  
43  
44 55 real prevalence of chronic lung diseases, and could underestimate the  
45  
46 56 effects of famine exposure.  
47  
48

49  
50 57 **Key words:** Famine; Developmental Origins of Health and Disease;  
51  
52 58 Chronic Lung Diseases; Infant  
53  
54

55  
56 59 **Introduction**  
57  
58  
59  
60

1  
2  
3  
4 60 The chronic lung diseases briefly include chronic obstructive lung diseases  
5  
6 61 (COPDs), chronic bronchitis, bronchial asthma, and lung heart disease  
7  
8  
9 62 (excluding lung tumors). Global Status Report on Non-Communicable  
10  
11 63 Diseases (NCDs) showed that respiratory diseases, including asthma and  
12  
13 64 chronic obstructive lung diseases were the third leading cause of NCDs deaths  
14  
15 65 in 2012 (about four million)[1]. Especially in the developing countries, the  
16  
17 66 burden of chronic lung diseases was heavier than that in the developed  
18  
19 67 countries[2].  
20  
21  
22  
23

24 68 The Development of Health and Disease theory speculated that the fetus in  
25  
26 69 utero would change their growth rate to adapt the condition of nutrients and  
27  
28 70 oxygen. However, several studies had found that these adaptive changes  
29  
30 71 might permanently modify the structure and physiological function of fetus[3, 4].  
31  
32  
33 72 The heavier lung diseases burden in the developing countries might be  
34  
35 73 associated with higher prevalence of low birth weight than that in the  
36  
37 74 developed countries. Several studies had found that the low birth weight was a  
38  
39 75 strong factor to predict reduction of forced expiratory vital capacity and forced  
40  
41 76 vital capacity[5-7]. Moreover, although some studies found that the low birth  
42  
43 77 weight increased the risk of asthma[8-12] and the mortality of chronic  
44  
45 78 obstructive lung disease[7], no consistent results was observed in previous  
46  
47 79 studies[13-16].  
48  
49  
50  
51  
52  
53  
54

55 80 Due to ethical limitations, we cannot perform the similar research in human  
56  
57 81 beings, but natural historical famines provided us a unique opportunity to  
58  
59  
60

1  
2  
3  
4 82 examine the DOHaD hypothesis in human beings. The Dutch famine  
5  
6 83 happened in the west of the Netherlands at the end of the World War II, it  
7  
8  
9 84 lasted for about six months. One study observed that mid-gestation exposure  
10  
11 85 to the Dutch famine increased significantly the prevalence of obstructive  
12  
13 86 airways disease in adulthood[17]. Compared with the Dutch famine, the  
14  
15  
16 87 Chinese famine happened in the east of Asia, starting in the end of 1950 and  
17  
18  
19 88 ending in the early of 1960, which lasted for about three years. A majority of  
20  
21 89 studies have found that early-life exposure to the Chinese famine linked with  
22  
23 90 hypertension[18], diabetes[19], metabolic syndrome[20] in adulthood, but the  
24  
25  
26 91 associations with chronic lung diseases are still unclear.  
27  
28

29  
30 92 In the current study, we used the public data of the China Health and  
31  
32 93 Retirement Longitudinal Study (CHARLS) 2011-2012 baseline survey, to  
33  
34 94 examine the associations between the Chinese famine exposure in early life  
35  
36 95 and the prevalence of chronic lung diseases in adulthood, and further to  
37  
38  
39 96 explore whether the associations were gender-specific.  
40  
41

## 42 97 **Methods**

### 43 98 **Sampling and participants**

44  
45  
46 99 Sampling in the present study was based on a national population-based  
47  
48  
49 100 longitudinal survey in 2011-2012 of CHARLS[21]. A total of 17,708 adults aged  
50  
51  
52 101  $\geq 45$  years old from 10,257 households were randomly selected to receive the  
53  
54  
55 102 household survey among 150 counties, 28 provinces, and autonomous  
56  
57  
58  
59  
60

1  
2  
3  
4 103 regions of China mainland. 4,182 participants out of 17,708 adults were  
5  
6 104 screened by birthdate into the present study. After excluding 47 subjects with  
7  
8  
9 105 information missing of chronic lung diseases, 4,135 subjects were enrolled into  
10  
11 106 our final analysis (Fig 1).

## 107 **Sampling and grouping**

108 Participants were divided into the non-exposed group and three  
109 famine-exposed groups (fetus, infant, and preschool-exposed groups). The  
110 Chinese famine began in January 1959 and ended in October 1961, and in  
111 order to minimize the misclassification of the famine exposure, we defined the  
112 participants born between October 1, 1962 and September 30, 1964 as the  
113 non-exposed group, the participants born between October 1, 1959 and  
114 September 30, 1961 as the fetal-exposed group, the participants born between  
115 January 1, 1958 and December 31, 1958 as the infant-exposed group, and  
116 defined the participants born between January 1, 1956 and December 31,  
117 1957 as the preschool-exposed group.

## 118 **Famine severity**

119 Despite the Chinese famine affected the entire China mainland, the severity  
120 was at different levels across provinces due to the difference of regional  
121 climate, population density and local food policies. Similar to the previous  
122 studies[18, 19], we also used the excess mortality during 1959-1961 compared  
123 with the 1956-1958 to evaluate of the severity of the famine in the present

1  
2  
3  
4 124 study, and 100% was used as the threshold of excess mortality to distinguish  
5  
6 125 the severity of famine exposure. The regions with excess mortality  $\geq 100\%$   
7  
8  
9 126 were categorized as the severely affected areas, and otherwise were  
10  
11 127 categorized as the less severely affected areas.

## 128 **Measurements**

### 129 **Diagnosis of chronic lung diseases**

130 In this study, data were collected through household survey by investigators  
131 who received unified training and passed the examination. The diagnosis of  
132 chronic lung diseases was based on the question of "Have you been  
133 diagnosed with chronic lung diseases, such as chronic bronchitis, emphysema  
134 (excluding tumors, or cancer) by a doctor? ". Subjects answering "Yes" were  
135 defined as persons suffering from chronic lung diseases, and subjects  
136 answering "No" as those who did not suffer from chronic lung diseases.

### 137 **Assessment of covariates**

138 The social demographic information, family economic status, the highest  
139 education attainment of parents, and lifestyle information including smoking  
140 status, drinking status were collected during face-to-face interviews in house  
141 by trained interviewers. The highest education attainments of parents was  
142 categorized into 4 levels: primary school or below, junior school, senior school,  
143 and college or above. Smoking status was classified into never smoking,  
144 former smoking, and current smoking (who smoked at least 1 cigarette per day

1  
2  
3  
4 145 in the last year). Drinking status was classified into never drinking, former  
5  
6 146 drinking, and current drinking (who drunk at least once per week in the last  
7  
8  
9 147 year). The mean level of the present sample (2,744 Chinese Yuan per person  
10  
11 148 per year) was used as cutoff point for family economic status (high vs. low  
12  
13  
14 149 income).

## 150 **Analysis**

151 Statistical analyses were preformed using IBM SPSS 20.0 (IBM Corporation,  
152 Armonk, NY, USA). Continuous and categorical variables were expressed as  
153 mean  $\pm$  standard deviation and percentage (%), respectively.

154 The Chi-square test was used to compare the difference of chronic lung  
155 diseases prevalence between the non-exposed group and famine-exposed  
156 group.

157 Univariate and multivariate binary logistic regression models by the maximum  
158 likelihood method were used to examine the risk of chronic lung diseases  
159 among the fetus, infant, and preschool-exposed groups, compared with the  
160 non-exposed group, respectively. In multivariate logistic regression model, we  
161 adjusted for gender, smoking, drinking, family economic status, and the  
162 highest education attainment of parents. Interactions between famine-exposed  
163 groups (fetus, infant, or preschool vs. non-exposed) and areas (severely  
164 affected vs. less severely affected) were tested by adding a multiplicative  
165 factor in the binary logistic regression model.



1  
2  
3  
4 166 In order to explore whether there exists a gender difference, stratified analysis  
5  
6 167 by gender was performed using the same methods. Data was expressed as  
7  
8  
9 168 odds ratio (OR) (95% confidence interval).

10  
11  
12 169  $P < 0.05$  for two-sided was considered statistically significant for all the  
13  
14 170 analysis.

## 171 **Ethics**

172 Our study is a secondary analysis of the de-identified CHARLS public data.  
173 The Medical Ethics Committee of Peking University granted the current study  
174 exemption from review. All the subjects were informed and consented for the  
175 protocol of study.

## 176 **Results**

177 The basic characteristics of participants were shown in **Table 1**. A total of  
178 4,135 participants were enrolled into the present study. The sample sizes of  
179 the non-exposed, fetus, infant, and preschool-exposed groups were 1,536,  
180 834, 518, and 1,247, respectively. The prevalence of chronic lung diseases for  
181 the non-exposed, fetus, infant, and preschool exposed groups was 6.1%, 6.5%,  
182 7.9%, and 6.8%, respectively. we did not observe a statistically significant  
183 difference of Chronic lung diseases prevalence among four groups ( $P=0.511$ ).

184 Stratified analysis by famine severity was showed in **Table 2**. Compared with  
185 the non-exposed group, only the prevalence of chronic lung diseases for the  
186 infant-exposed group was significantly higher in severely affected area (5.6%

1  
2  
3  
4 187 vs.10.4%). Stratified by severity of famine exposure, we found that subjects in  
5  
6 188 the infant-exposed group were at a higher risk of chronic lung diseases than  
7  
8  
9 189 the non-exposed group in severely affected area (OR=1.95; 95% CI: 1.10,  
10  
11 190 3.44), even after adjusting for gender, smoking, drinking, family economic  
12  
13  
14 191 status, and the highest education attainment (OR=2.57; 95% CI: 1.26, 5.25).  
15  
16 192 However, we did not observe the consistent associations in other  
17  
18  
19 193 famine-exposed groups and in less severely affected areas. In addition, we did  
20  
21 194 not observe any significant interactions between famine exposure groups  
22  
23  
24 195 (fetus, infant, or preschool vs. non-exposed) and areas (severely affected vs.  
25  
26 196 less severely affected).

27  
28  
29 197 **Table 3** presents the results of stratified analysis by gender and famine  
30  
31  
32 198 severity. In males, we observed that the infant-exposed group (OR=3.16; 95%  
33  
34 199 CI: 1.17, 8.51) significantly increased the risk of chronic lung diseases in  
35  
36  
37 200 severely affected area, compared with the non-exposed group. The consistent  
38  
39 201 associations were not observed in fetal and preschool-exposed groups and in  
40  
41  
42 202 less severely affected area. In females, we did not observe any significant  
43  
44 203 associations between famine exposed groups and the non-exposed group.  
45  
46  
47 204 Any significant interactions were not observed between famine exposed  
48  
49 205 groups (fetus, infant, or preschool vs. non-exposed) and areas (severely  
50  
51  
52 206 affected vs. less severely affected) neither males nor females.

## 207 **Discussion**

1  
2  
3  
4 208 In the current study, we observed that the infant exposure to the Chinese  
5  
6 209 famine significantly increased the risk of chronic lung diseases in later life.  
7  
8  
9 210 After stratifying by gender and famine severity, we found only the infant  
10  
11 211 exposure to severe famine significantly increased the risk of chronic lung  
12  
13 212 diseases in male adults, indicating that the infant period might be a critical  
14  
15 213 period for human lung structure and function development.

16  
17  
18  
19 214 Several mechanisms could explain the associations. 1) Early-life exposure to  
20  
21 215 the severe famine might perpetually modify the bronchial reactivity during rapid  
22  
23 216 growth. One Dutch famine study found that gestation the famine exposure  
24  
25 217 affected neither the concentrations of total or specific IgE nor lung function  
26  
27 218 values (FEV<sub>1</sub> and FVC), but they observed a significant associations between  
28  
29 219 exposure to famine in mid and early gestation and obstructive airways disease  
30  
31 220 in adulthood[17]. The results indicated that famine exposure might not change  
32  
33 221 the lung function and atopic disease, but could permanently modify the  
34  
35 222 bronchial responsiveness. Though we could not assure the assumption  
36  
37 223 because bronchial reactivity was not measured in this study, this assumption  
38  
39 224 can be one way to explain the mechanism. 2) Severe malnutrition during early  
40  
41 225 life might increase susceptibility to pulmonary injury in later life. Animal model  
42  
43 226 study had found that young animals who were exposed to a low protein  
44  
45 227 maternal diet in fetus were more likely to suffer pulmonary injury than  
46  
47 228 non-exposed young animals, which indicated the programming of the  
48  
49 229 antioxidant defenses and immune system[22]. Another animal study reported  
50  
51  
52  
53  
54  
55  
56  
57  
58  
59  
60

1  
2  
3  
4 230 that fetuses exposed to a low protein diet significantly decreased the binding of  
5  
6 231 dexamethasone to lung receptors[23].  
7  
8

9 232 The present study further added the new direct evidence in human beings for  
10  
11 233 the fetus origin of diseases. To our knowledge, only one Dutch study explored  
12  
13 234 the associations between the early-life famine exposure and atopy, lung  
14  
15 235 function, and obstructive airways disease, and found that the famine exposure  
16  
17 236 in mid and early gestation might significantly increase the prevalence of  
18  
19 237 obstructive airways disease. Results of the Dutch study were inconsistent with  
20  
21 238 the current study. In this study, we found that only the severe famine exposure  
22  
23 239 in infant stage significantly increased the risk of chronic lung diseases in  
24  
25 240 adulthood. Several reasons could explain the difference. Firstly, race might be  
26  
27 241 a main reason between the two studies. Subjects in the Dutch study came  
28  
29 242 from White European, while subjects in this study were from Asian. Secondly,  
30  
31 243 severity and duration could be another important discrepancy. The Dutch  
32  
33 244 famine only lasted for about six months, while the Chinese famine lasted for  
34  
35 245 about three years. Furthermore, the Chinese famine led to approximately thirty  
36  
37 246 millions premature death[24]. However, the mortality rate during famine period  
38  
39 247 (1945) was more than twice as high as that in 1939, and most of the excess  
40  
41 248 mortality was attributed to severe malnutrition[25].  
42  
43  
44  
45  
46  
47  
48  
49  
50

51  
52  
53 249 It was interesting that we observed the severe famine exposure in infant period  
54  
55 250 significantly increased the risk of chronic lung diseases among men, but not  
56  
57 251 among women, which seems to be contradictory to the severity of famine  
58  
59  
60

1  
2  
3  
4 252 exposure. Chinese parents have held a profound and lasting tradition of  
5  
6 253 “Preferring boys to girls”, and thus boys may have been protected better  
7  
8  
9 254 against the famine by parents. It was inconsistent with metabolic syndrome[26].  
10  
11 255 We speculated that boy’s lungs development could be more sensitive to  
12  
13 256 severely malnutrition in early-life. But the specific mechanisms need to be  
14  
15 257 further explored in future study.  
16  
17  
18  
19 258 There are several limitations in this study. The primary limitation is the  
20  
21 259 selection bias. Severe famine could eliminate weaker participants, and remain  
22  
23 260 the healthier participants, which may decrease the real effect of famine  
24  
25 261 exposure. Secondly, similar to other the Chinese famine studies[18, 19, 27],  
26  
27 262 the present study also lacked the objective indicators that reflected the severity  
28  
29 263 of famine exposure, e.g. birth weight, birth body length. Thirdly, because both  
30  
31 264 bad weather and infection in early-life could increase the risk of chronic lung  
32  
33 265 diseases, we could not attribute all the excess mortality rate to the famine  
34  
35 266 exposure. In addition, we cannot separate the effect of age from famine  
36  
37 267 exposure. Despite these limitations, the present study used the data of China  
38  
39 268 Health and Retirement Longitudinal Study 2011-2012 baseline survey that has  
40  
41 269 broad representative of entire China mainland, and found that infant exposure  
42  
43 270 to severe famine significantly increased the risk of chronic lung disease among  
44  
45 271 men.  
46  
47  
48  
49  
50  
51  
52  
53  
54

## 272 **Conclusions**

1  
2  
3  
4 273 Infant exposure to severe famine could increase the risk of chronic lung  
5  
6 274 diseases in male adults, indicating that the infant stage might be the critical  
7  
8  
9 275 period of lungs development for men.

## 10 11 12 276 **Footnotes**

13  
14  
15 277 **Contributors** JM and ZZ were co-investigators and designed the study, ZW,  
16  
17 278 ZY and YD carried out the initial analysis, and supervised data analysis. All  
18  
19  
20 279 authors were involved in writing the paper and had final approval of the  
21  
22  
23 280 submitted and published versions.

24  
25  
26 281 **Funding** This work was supported by National Science Foundation of China  
27  
28 282 (NSFC 81402692, 81673192).

29  
30  
31 283 **Competing interests** The authors declared that they had no competing  
32  
33  
34 284 interests.

35  
36  
37 285 Our study is a secondary analysis of the de-identified CHARLS public data.  
38  
39 286 The Medical Ethics Committee of Peking University granted the current study  
40  
41  
42 287 exemption from review. All the subjects were informed and consented for the  
43  
44  
45 288 protocol of study.

## 46 47 48 289 **Consent for publication**

49  
50 290 Not applicable.

## 51 52 53 291 **Availability of data and material**

54  
55  
56  
57 292 The datasets analyzed in the current study are available in the  
58  
59  
60

1  
2  
3  
4 293 <http://charls.pku.edu.cn/zh-CN/page/data/2011-charls-wave1>.

5  
6  
7 294 **Acknowledgements**

8  
9  
10 295 We would like to acknowledge the team of China Health and Retirement  
11  
12 296 Longitudinal Study (CHARLS) 2011-2012 baseline survey. We are grateful to  
13  
14  
15 297 all the participants who participated in the baseline survey for their labor, and  
16  
17 298 we also acknowledge all the subjects and households that participated in the  
18  
19  
20 299 survey for their cooperation.

21  
22  
23 300 **Reference**

- 24  
25 301 1. Zhou M, Wang H, Zhu J, Chen W, Wang L, Liu S, et al. Cause-specific  
26 302 mortality for 240 causes in China during 1990-2013: a systematic subnational  
27 303 analysis for the Global Burden of Disease Study 2013. *Lancet*. 2016 Jan  
28 304 16;387(10015):251-72. doi: 10.1016/S0140-6736(15)00551-6.  
29  
30 305 2. Global Burden of Disease Study C. Global, regional, and national  
31 306 incidence, prevalence, and years lived with disability for 301 acute and chronic  
32 307 diseases and injuries in 188 countries, 1990-2013: a systematic analysis for  
33 308 the Global Burden of Disease Study 2013. *Lancet*. 2015 Aug  
34 309 22;386(9995):743-800. doi: 10.1016/S0140-6736(15)60692-4.  
35  
36 310 3. Li J, Na L, Ma H, Zhang Z, Li T, Lin L, et al. Multigenerational effects  
37 311 of parental prenatal exposure to famine on adult offspring cognitive function.  
38 312 *Scientific reports*. 2015;5:13792. doi: 10.1038/srep13792.  
39  
40 313 4. Wadhwa PD, Buss C, Entringer S, Swanson JM. Developmental  
41 314 origins of health and disease: brief history of the approach and current focus  
42 315 on epigenetic mechanisms. *Seminars in reproductive medicine*. 2009  
43 316 Sep;27(5):358-68. doi: 10.1055/s-0029-1237424.  
44  
45 317 5. Stein CE, Kumaran K, Fall CH, Shaheen SO, Osmond C, Barker DJ.  
46 318 Relation of fetal growth to adult lung function in south India. *Thorax*. 1997  
47 319 Oct;52(10):895-9.  
48  
49 320 6. Rona RJ, Gulliford MC, Chinn S. Effects of prematurity and  
50 321 intrauterine growth on respiratory health and lung function in childhood. *Bmj*.  
51 322 1993 Mar 27;306(6881):817-20.

- 1  
2  
3 323 7. Barker DJ, Godfrey KM, Fall C, Osmond C, Winter PD, Shaheen SO.  
4 324 Relation of birth weight and childhood respiratory infection to adult lung  
5 325 function and death from chronic obstructive airways disease. *Bmj*. 1991 Sep  
6 326 21;303(6804):671-5.
- 7  
8  
9 327 8. Shaheen SO, Sterne JA, Montgomery SM, Azima H. Birth weight,  
10 328 body mass index and asthma in young adults. *Thorax*. 1999  
11 329 May;54(5):396-402.
- 12  
13 330 9. Slezak JA, Persky VW, Kviz FJ, Ramakrishnan V, Byers C. Asthma  
14 331 prevalence and risk factors in selected Head Start sites in Chicago. *The*  
15 332 *Journal of asthma : official journal of the Association for the Care of Asthma*.  
16 333 1998;35(2):203-12.
- 17  
18  
19 334 10. Schaubel D, Johansen H, Dutta M, Desmeules M, Becker A, Mao Y.  
20 335 Neonatal characteristics as risk factors for preschool asthma. *The Journal of*  
21 336 *asthma : official journal of the Association for the Care of Asthma*.  
22 337 1996;33(4):255-64.
- 23  
24  
25 338 11. Oliveti JF, Kercksmar CM, Redline S. Pre- and perinatal risk factors for  
26 339 asthma in inner city African-American children. *Am J Epidemiol*. 1996 Mar  
27 340 15;143(6):570-7.
- 28  
29 341 12. Arshad SH, Stevens M, Hide DW. The effect of genetic and  
30 342 environmental factors on the prevalence of allergic disorders at the age of two  
31 343 years. *Clinical and experimental allergy : journal of the British Society for*  
32 344 *Allergy and Clinical Immunology*. 1993 Jun;23(6):504-11.
- 33  
34  
35 345 13. Shaheen SO, Sterne JA, Tucker JS, Florey CD. Birth weight,  
36 346 childhood lower respiratory tract infection, and adult lung function. *Thorax*.  
37 347 1998 Jul;53(7):549-53.
- 38  
39 348 14. Sears MR, Holdaway MD, Flannery EM, Herbison GP, Silva PA.  
40 349 Parental and neonatal risk factors for atopy, airway hyper-responsiveness, and  
41 350 asthma. *Arch Dis Child*. 1996 Nov;75(5):392-8.
- 42  
43 351 15. Matthes JW, Lewis PA, Davies DP, Bethel JA. Birth weight at term  
44 352 and lung function in adolescence: no evidence for a programmed effect. *Arch*  
45 353 *Dis Child*. 1995 Sep;73(3):231-4.
- 46  
47  
48 354 16. Kelly YJ, Brabin BJ, Milligan P, Heaf DP, Reid J, Pearson MG.  
49 355 Maternal asthma, premature birth, and the risk of respiratory morbidity in  
50 356 schoolchildren in Merseyside. *Thorax*. 1995 May;50(5):525-30.
- 51  
52 357 17. Lopuhaa CE, Roseboom TJ, Osmond C, Barker DJ, Ravelli AC,  
53 358 Bleker OP, et al. Atopy, lung function, and obstructive airways disease after  
54 359 prenatal exposure to famine. *Thorax*. 2000 Jul;55(7):555-61.
- 55  
56 360 18. Li Y, Jaddoe VW, Qi L, He Y, Lai J, Wang J, et al. Exposure to the  
57 361 Chinese famine in early life and the risk of hypertension in adulthood. *Journal*



- 1  
2  
3 362 of hypertension. 2011 Jun;29(6):1085-92. doi:  
4 363 10.1097/HJH.0b013e328345d969.  
5  
6 364 19. Li Y, He Y, Qi L, Jaddoe VW, Feskens EJ, Yang X, et al. Exposure to  
7 365 the Chinese famine in early life and the risk of hyperglycemia and type 2  
8 366 diabetes in adulthood. *Diabetes*. 2010 Oct;59(10):2400-6. doi:  
9 367 10.2337/db10-0385.  
10  
11 368 20. Li Y, Jaddoe VW, Qi L, He Y, Wang D, Lai J, et al. Exposure to the  
12 369 chinese famine in early life and the risk of metabolic syndrome in adulthood.  
13 370 *Diabetes Care*. 2011 Apr;34(4):1014-8. doi: 10.2337/dc10-2039.  
14  
15 371 21. Zhao Y, Hu Y, Smith JP, Strauss J, Yang G. Group profile: the China  
16 372 Health and Retirement Longitudinal Study (CHARLS). *International journal of*  
17 373 *epidemiology*. 2014;43(1):61-8.  
18  
19 374 22. Langle-Evans SC, Phillips GJ, Jackson AA. Fetal exposure to low  
20 375 protein maternal diet alters the susceptibility of young adult rats to sulfur  
21 376 dioxide-induced lung injury. *J Nutr*. 1997 Feb;127(2):202-9.  
22  
23 377 23. Mulay S, Browne CA, Varma DR, Solomon S. Placental hormones,  
24 378 nutrition, and fetal development. *Federation proceedings*. 1980  
25 379 Feb;39(2):261-5.  
26  
27 380 24. Cai Y, Feng W. Famine, social disruption, and involuntary fetal loss:  
28 381 evidence from Chinese survey data. *Demography*. 2005 May;42(2):301-22.  
29  
30 382 25. Banning C. Food Shortage and Public Health, First Half of 1945.  
31 383 *Annals of the American Academy of Political & Socialence*.  
32 384 1946;245(2):93-110.  
33  
34 385 26. Zheng X, Wang Y, Ren W, Luo R, Zhang S, Zhang JH, et al. Risk of  
35 386 metabolic syndrome in adults exposed to the great Chinese famine during the  
36 387 fetal life and early childhood. *Eur J Clin Nutr*. 2012 Feb;66(2):231-6. doi:  
37 388 10.1038/ejcn.2011.161.  
38  
39 389 27. Wang Z, Li C, Yang Z, Zou Z, Ma J. Infant exposure to Chinese  
40 390 famine increased the risk of hypertension in adulthood: results from the China  
41 391 Health and Retirement Longitudinal Study. *BMC public health*. 2016;16(1):435.  
42 392 doi: 10.1186/s12889-016-3122-x.  
43 393  
44  
45  
46  
47  
48  
49  
50  
51  
52  
53  
54  
55  
56  
57  
58  
59  
60

394 **Table 1** Basic characteristics of study population according to the Chinese famine  
 395 exposure

| Variances                              | Non-exposed group       | Fetal-exposed group     | Infant-exposed group   | Preschool-exposed group | <i>P</i> value  |
|----------------------------------------|-------------------------|-------------------------|------------------------|-------------------------|-----------------|
| Birth date                             | 10/1/1962–<br>9/30/1964 | 10/1/1959–<br>9/30/1961 | 19581/1–<br>12/31/1958 | 1/1/1956–<br>12/31/1957 |                 |
| N                                      | 1,536                   | 834                     | 518                    | 1,247                   |                 |
| Age in 2011(years)                     | 47~49                   | 50~51                   | 53                     | 54~55                   |                 |
| Born in severely affected area, n (%)  | 657(42.8)               | 269(32.3)               | 192(37.1)              | 482(38.7)               | <i>P</i> <0.001 |
| Women, n (%)                           | 801(52.2)               | 438(52.6)               | 241(46.5)              | 614(49.3)               | <i>P</i> =0.067 |
| Smoking, n (%)                         |                         |                         |                        |                         | <i>P</i> =0.014 |
| Never                                  | 970(66.4)               | 519(65.1)               | 297(61.4)              | 711(59.8)               |                 |
| Former                                 | 80(5.5)                 | 36(4.5)                 | 28(5.8)                | 77(6.5)                 |                 |
| Current                                | 410(28.1)               | 242(30.4)               | 159(32.9)              | 400(33.7)               |                 |
| Drinking, n (%)                        |                         |                         |                        |                         | <i>P</i> =0.614 |
| Never                                  | 948(61.8)               | 513(61.6)               | 320(61.9)              | 787(63.2)               |                 |
| Less than once per months              | 155(10.1)               | 82(9.8)                 | 53(10.3)               | 100(8.0)                |                 |
| More than once per months              | 430(28.0)               | 238(28.6)               | 144(27.9)              | 359(28.8)               |                 |
| Family income, n (%)                   |                         |                         |                        |                         | <i>P</i> =0.960 |
| High                                   | 199(54.4)               | 115(53.5)               | 65(52.4)               | 143(52.4)               |                 |
| Low                                    | 167(45.6)               | 100(46.5)               | 59(47.6)               | 130(47.6)               |                 |
| Education, n (%)                       |                         |                         |                        |                         | <i>P</i> =0.390 |
| Primary school and below               | 695(89.7)               | 396(89.8)               | 246(88.8)              | 567(92.5)               |                 |
| Junior school                          | 40(5.2)                 | 27(6.1)                 | 16(5.8)                | 25(4.1)                 |                 |
| High school                            | 31(4.0)                 | 12(2.7)                 | 10(3.6)                | 19(3.1)                 |                 |
| College and above                      | 9(1.2)                  | 6(1.4)                  | 5(1.8)                 | 2(0.3)                  |                 |
| Prevalence of chronic lung disease (%) | 6.1                     | 6.5                     | 7.9                    | 6.8                     | <i>P</i> =0.511 |

396

397

398 **Table 2** The risk of chronic lung diseased among three exposed groups compare with the  
 399 non-exposed group.

| Variances                                               | Non-exposed group | Fetal-exposed group | Infant-exposed group | Preschool-exposed group |
|---------------------------------------------------------|-------------------|---------------------|----------------------|-------------------------|
| Severely affected famine area                           |                   |                     |                      |                         |
| Prevalence (%)                                          | 5.6               | 5.6                 | 10.4                 | 5.6                     |
| $P^a$                                                   |                   | 0.973               | 0.022                | 0.983                   |
| Odds ratio (95% CI) <sup>a</sup>                        | Ref.              | 0.99(0.53-1.84)     | 1.95(1.10-3.44)      | 0.99(0.60-1.66)         |
| $P^b$                                                   |                   | 0.953               | 0.009                | 0.437                   |
| Odds ratio (95% CI) <sup>b</sup>                        | Ref.              | 0.98(0.43-2.20)     | 2.57(1.26-5.25)      | 0.75(0.36-1.56)         |
| Less severely affected famine area                      |                   |                     |                      |                         |
| Prevalence (%)                                          | 6.4               | 6.9                 | 6.4                  | 7.6                     |
| $P^a$                                                   |                   | 0.691               | 0.964                | 0.336                   |
| Odds ratio (95% CI) <sup>a</sup>                        | Ref.              | 1.09(0.71-1.66)     | 1.01(0.60-1.70)      | 1.21(0.82-1.76)         |
| $P^b$                                                   |                   | 0.254               | 0.398                | 0.471                   |
| Odds ratio (95% CI) <sup>b</sup>                        | Ref.              | 1.38(0.79-2.41)     | 1.33(0.69-3.56)      | 1.22(0.71-2.10)         |
| $P$ for interaction between area and group <sup>a</sup> | Ref.              | 0.468               | 0.109                | 0.178                   |
| $P$ for interaction between area and group <sup>b</sup> | Ref.              | 0.421               | 0.061                | 0.223                   |

400 <sup>a</sup>Single variance binary logistics regression model.

401 <sup>b</sup>Multi-variance binary logistics regression model, adjusted for gender, smoking, drinking,  
 402 family economic status and the highest education attainment of parents.

403

404 **Table 3** Prevalence rate of chronic lung diseases by gender, birth group and severity of  
 405 the Chinese famine area

| Variables                                                  | Non-exposed group | Fetal-exposed group | Infant-exposed group | Preschool-exposed group |
|------------------------------------------------------------|-------------------|---------------------|----------------------|-------------------------|
| <b>Female</b>                                              |                   |                     |                      |                         |
| <b>Severely affected area</b>                              |                   |                     |                      |                         |
| Prevalence (%)                                             | 5.0               | 5.3                 | 7.5                  | 4.7                     |
| $P^a$                                                      |                   | 0.907               | 0.359                | 0.861                   |
| Odds ratio (95% CI) <sup>a</sup>                           | Ref.              | 1.05(0.44-2.50)     | 1.53(0.62-3.81)      | 0.93(0.43-2.03)         |
| $P^b$                                                      |                   | 0.514               | 0.208                | 0.479                   |
| Odds ratio (95% CI) <sup>b</sup>                           | Ref.              | 1.39(0.52-3.74)     | 1.98(0.68-5.72)      | 0.67(0.23-2.01)         |
| <b>Less severely affected area</b>                         |                   |                     |                      |                         |
| Prevalence (%)                                             | 6.9               | 7.0                 | 4.1                  | 9.4                     |
| $P^a$                                                      |                   | 0.970               | 0.218                | 0.176                   |
| Odds ratio (95% CI) <sup>a</sup>                           | Ref.              | 1.01(0.57-1.81)     | 0.57(0.23-1.39)      | 1.41(0.86-2.32)         |
| $P^b$                                                      |                   | 0.238               | 0.644                | 0.359                   |
| Odds ratio (95% CI) <sup>b</sup>                           | Ref.              | 1.55(0.75-3.23)     | 0.77(0.24-2.39)      | 1.40(0.68-2.89)         |
| $P$ for interaction between area and group <sup>a</sup>    | Ref.              | 0.498               | 0.252                | 0.036                   |
| $P$ for interaction between smoking and group <sup>a</sup> | Ref.              | 0.907               | 0.003                | 0.028                   |
| $P$ for interaction between area and group <sup>b</sup>    | Ref.              | 0.686               | 0.179                | 0.132                   |
| $P$ for interaction between smoking and group <sup>b</sup> | Ref.              | 0.999               | 0.614                | 0.0628                  |
| <b>Male</b>                                                |                   |                     |                      |                         |
| <b>Severely affected area</b>                              |                   |                     |                      |                         |
| Prevalence (%)                                             | 6.3               | 5.9                 | 13.1                 | 6.5                     |
| $P^a$                                                      |                   | 0.897               | 0.030                | 0.930                   |
| Odds ratio (95% CI) <sup>a</sup>                           | Ref.              | 0.94(0.39-2.29)     | 2.26(1.08-4.73)      | 1.03(0.52-3.03)         |
| $P^b$                                                      |                   | 0.677               | 0.023                | 0.686                   |
| Odds ratio (95% CI) <sup>b</sup>                           | Ref.              | 0.75(0.20-2.87)     | 3.16(1.17-8.51)      | 0.81(0.30-2.22)         |
| <b>Less severely affected area</b>                         |                   |                     |                      |                         |
| Prevalence (%)                                             | 5.8               | 6.9                 | 8.4                  | 5.7                     |
| $P^a$                                                      |                   | 0.566               | 0.237                | 0.974                   |
| Odds ratio (95% CI) <sup>a</sup>                           | Ref.              | 1.20(0.64-2.24)     | 1.50(0.77-2.93)      | 0.99(0.55-1.80)         |
| $P^b$                                                      |                   | 0.584               | 0.178                | 0.853                   |
| Odds ratio (95% CI) <sup>b</sup>                           | Ref.              | 1.28(0.53-3.07)     | 1.82(0.76-4.36)      | 1.08(0.45-2.60)         |
| $P$ for interaction between area and group <sup>a</sup>    | Ref.              | 0.734               | 0.217                | 0.709                   |
| $P$ for interaction between smoking and group <sup>a</sup> | Ref.              | 0.409               | 0.300                | 0.207                   |
| $P$ for interaction between area and group <sup>b</sup>    | Ref.              | 0.344               | 0.127                | 0.887                   |
| $P$ for interaction between smoking and group <sup>b</sup> | Ref.              | 0.950               | 0.103                | 0.696                   |

406 <sup>a</sup>Single variance binary logistics regression model.

407 <sup>b</sup>Multi-variance binary logistics regression model, adjusted for smoking, drinking, family  
 408 economic status and the highest education attainment of parents.

409

410

411

1  
2  
3  
4  
5  
6  
7  
8  
9  
10  
11  
12  
13  
14  
15  
16  
17  
18  
19  
20  
21  
22  
23  
24  
25  
26  
27  
28  
29  
30  
31  
32  
33  
34  
35  
36  
37  
38  
39  
40  
41  
42  
43  
44  
45  
46  
47  
48  
49  
50  
51  
52  
53  
54  
55  
56  
57  
58  
59  
60

412 **Fig 1.** Flowchart on the sample selecting methods at each step

413 **Figure legends**

414 \* Means missing of chronic lung diseases information in raw database.

415

For peer review only

1  
2  
3  
4  
5  
6  
7  
8  
9  
10  
11  
12  
13  
14  
15  
16  
17  
18  
19  
20  
21  
22  
23  
24  
25  
26  
27  
28  
29  
30  
31  
32  
33  
34  
35  
36  
37  
38  
39  
40  
41  
42  
43  
44  
45  
46  
47  
48  
49  
50  
51  
52  
53  
54  
55  
56  
57  
58  
59  
60

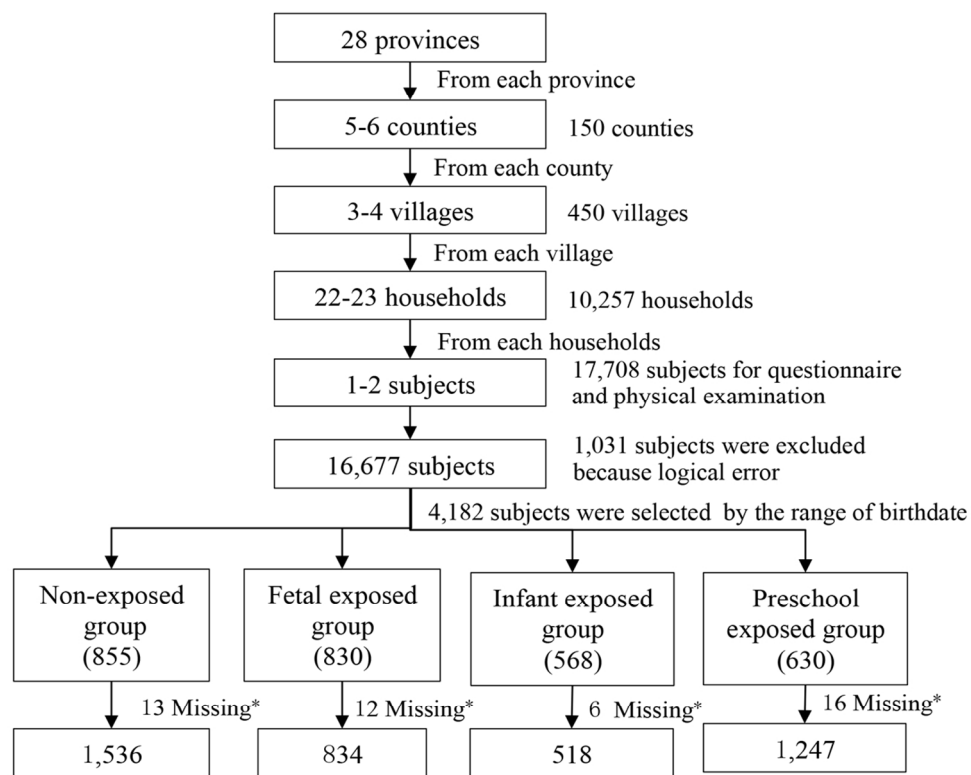

Fig 1. Flowchart on the sample selecting methods at each step

\* Means missing of chronic lung diseases information in raw database.

114x93mm (300 x 300 DPI)

Only

**Supplementary Table 1** The effect of smoking, drinking, family economic status and parents' education attainment on the prevalence rates of chronic lung diseases

| Variances                           | B      | S.E.  | Wald   | df | P     | Exp(B) | 95% CI.for EXP(B) |       |
|-------------------------------------|--------|-------|--------|----|-------|--------|-------------------|-------|
|                                     |        |       |        |    |       |        | Lower             | Upper |
| <b>Male</b>                         |        |       |        |    |       |        |                   |       |
| <b>Less severely affected areas</b> |        |       |        |    |       |        |                   |       |
| Groups                              |        |       | 2.157  | 3  | 0.54  |        |                   |       |
| Fetal-exposed                       | 0.245  | 0.447 | 0.3    | 1  | 0.584 | 1.277  | 0.532             | 3.067 |
| Infant-exposed                      | 0.6    | 0.445 | 1.815  | 1  | 0.178 | 1.822  | 0.761             | 4.362 |
| Preschool-exposed                   | 0.083  | 0.446 | 0.034  | 1  | 0.853 | 1.086  | 0.453             | 2.603 |
| Smoking                             | 0.141  | 0.193 | 0.532  | 1  | 0.466 | 1.151  | 0.789             | 1.681 |
| Drinking                            | -0.124 | 0.166 | 0.557  | 1  | 0.456 | 0.883  | 0.638             | 1.224 |
| Parents' education attainment       | -0.133 | 0.363 | 0.134  | 1  | 0.714 | 0.876  | 0.43              | 1.783 |
| Family economic status              | -0.131 | 0.347 | 0.143  | 1  | 0.706 | 0.877  | 0.444             | 1.733 |
| Constant                            | -2.579 | 0.786 | 10.779 | 1  | 0.001 | 0.076  |                   |       |
| <b>Severely affected areas</b>      |        |       |        |    |       |        |                   |       |
| Groups                              |        |       | 8.343  | 3  | 0.039 |        |                   |       |
| Fetal-exposed                       | -0.285 | 0.684 | 0.174  | 1  | 0.677 | 0.752  | 0.197             | 2.872 |
| Infant-exposed                      | 1.15   | 0.506 | 5.175  | 1  | 0.023 | 3.158  | 1.173             | 8.508 |
| Preschool-exposed                   | -0.207 | 0.513 | 0.163  | 1  | 0.686 | 0.813  | 0.297             | 2.221 |
| Smoking                             | 0.188  | 0.243 | 0.595  | 1  | 0.441 | 1.206  | 0.749             | 1.943 |
| Drinking                            | -0.192 | 0.215 | 0.801  | 1  | 0.371 | 0.825  | 0.541             | 1.257 |
| Parents' education attainment       | 0.217  | 0.472 | 0.211  | 1  | 0.646 | 1.242  | 0.492             | 3.136 |
| Family economic status              | 0.306  | 0.521 | 0.346  | 1  | 0.556 | 1.359  | 0.489             | 3.772 |
| Constant                            | -3.075 | 1.028 | 8.939  | 1  | 0.003 | 0.046  |                   |       |
| <b>Female</b>                       |        |       |        |    |       |        |                   |       |
| <b>Less severely affected areas</b> |        |       |        |    |       |        |                   |       |
| Groups                              |        |       | 2.448  | 3  | 0.485 |        |                   |       |
| Fetal-exposed                       | 0.44   | 0.373 | 1.392  | 1  | 0.238 | 1.553  | 0.747             | 3.226 |
| Infant-exposed                      | -0.268 | 0.581 | 0.214  | 1  | 0.644 | 0.765  | 0.245             | 2.386 |
| Preschool-exposed                   | 0.339  | 0.369 | 0.841  | 1  | 0.359 | 1.403  | 0.68              | 2.893 |
| Smoking                             | 0.29   | 0.259 | 1.251  | 1  | 0.263 | 1.336  | 0.804             | 2.219 |
| Drinking                            | 0.038  | 0.264 | 0.02   | 1  | 0.886 | 1.038  | 0.62              | 1.741 |
| Parents' education attainment       | 0.301  | 0.221 | 1.842  | 1  | 0.175 | 1.351  | 0.875             | 2.085 |
| Family economic status              | -0.351 | 0.401 | 0.768  | 1  | 0.381 | 0.704  | 0.321             | 1.543 |
| Constant                            | -3.352 | 0.562 | 35.558 | 1  | 0     | 0.035  |                   |       |
| <b>Severely affected areas</b>      |        |       |        |    |       |        |                   |       |
| Groups                              |        |       | 3.288  | 3  | 0.349 |        |                   |       |
| Fetal-exposed                       | 0.329  | 0.505 | 0.425  | 1  | 0.514 | 1.39   | 0.516             | 3.742 |
| Infant-exposed                      | 0.682  | 0.542 | 1.583  | 1  | 0.208 | 1.977  | 0.684             | 5.717 |
| Preschool-exposed                   | -0.395 | 0.558 | 0.501  | 1  | 0.479 | 0.674  | 0.226             | 2.011 |
| Smoking                             | 0.337  | 0.584 | 0.333  | 1  | 0.564 | 1.401  | 0.446             | 4.396 |
| Drinking                            | -0.38  | 0.421 | 0.813  | 1  | 0.367 | 0.684  | 0.3               | 1.562 |
| Parents' education attainment       | 0.224  | 0.286 | 0.616  | 1  | 0.433 | 1.252  | 0.715             | 2.192 |
| Family economic status              | 0.355  | 0.422 | 0.71   | 1  | 0.399 | 1.427  | 0.624             | 3.261 |
| Constant                            | -3.045 | 0.895 | 11.59  | 1  | 0.001 | 0.048  |                   |       |

STROBE Statement—Checklist of items that should be included in reports of *cross-sectional studies*

|                              | Item No | Recommendation                                                                                                                                                                                                                                                                                                                                                                                                                                                                                                           |
|------------------------------|---------|--------------------------------------------------------------------------------------------------------------------------------------------------------------------------------------------------------------------------------------------------------------------------------------------------------------------------------------------------------------------------------------------------------------------------------------------------------------------------------------------------------------------------|
| <b>Title and abstract</b>    | 1       | (a) Indicate the study's design with a commonly used term in the title or the abstract<br>(b) Provide in the abstract an informative and balanced summary of what was done and what was found<br><i>Please see page 1, the title and abstract.</i>                                                                                                                                                                                                                                                                       |
| <b>Introduction</b>          |         |                                                                                                                                                                                                                                                                                                                                                                                                                                                                                                                          |
| Background/rationale         | 2       | Explain the scientific background and rationale for the investigation being reported<br><i>Please see page 4-5, the first three paragraphs of the "Introduction" section.</i>                                                                                                                                                                                                                                                                                                                                            |
| Objectives                   | 3       | State specific objectives, including any prespecified hypotheses<br><i>Please see page 5, the last paragraph of the "Introduction" section.</i>                                                                                                                                                                                                                                                                                                                                                                          |
| <b>Methods</b>               |         |                                                                                                                                                                                                                                                                                                                                                                                                                                                                                                                          |
| Study design                 | 4       | Present key elements of study design early in the paper<br><i>Please see page 5-6, the "Sampling and participants" section.</i>                                                                                                                                                                                                                                                                                                                                                                                          |
| Setting                      | 5       | Describe the setting, locations, and relevant dates, including periods of recruitment, exposure, follow-up, and data collection<br><i>Please see page 5-6, the "Sampling and participants" section.</i>                                                                                                                                                                                                                                                                                                                  |
| Participants                 | 6       | (a) Give the eligibility criteria, and the sources and methods of selection of participants<br><i>Please see page 6, the "Sampling and grouping" section.</i>                                                                                                                                                                                                                                                                                                                                                            |
| Variables                    | 7       | Clearly define all outcomes, exposures, predictors, potential confounders, and effect modifiers. Give diagnostic criteria, if applicable<br><i>Please see page 6-7, the "Measurements" section, and the "Famine severity" section.</i>                                                                                                                                                                                                                                                                                   |
| Data sources/<br>measurement | 8*      | For each variable of interest, give sources of data and details of methods of assessment (measurement). Describe comparability of assessment methods if there is more than one group<br><i>Please see page 6-7, the "Measurements" section, and the "Famine severity" section.</i>                                                                                                                                                                                                                                       |
| Bias                         | 9       | Describe any efforts to address potential sources of bias<br><i>Please see page 7, the "Diagnosis of chronic lung diseases" section.</i>                                                                                                                                                                                                                                                                                                                                                                                 |
| Study size                   | 10      | Explain how the study size was arrived at<br><i>Please see page 5-6, the "Sampling and participants" section.</i>                                                                                                                                                                                                                                                                                                                                                                                                        |
| Quantitative variables       | 11      | Explain how quantitative variables were handled in the analyses. If applicable, describe which groupings were chosen and why<br><i>Please see page 6-7, the "Assessment of covariates" section.</i>                                                                                                                                                                                                                                                                                                                      |
| Statistical methods          | 12      | (a) Describe all statistical methods, including those used to control for confounding<br><i>Please see page 8-9, the "Analysis" section.</i><br>(b) Describe any methods used to examine subgroups and interactions<br><i>Please see page 8-9, the third paragraph of "Analysis" section.</i><br>(c) Explain how missing data were addressed<br><i>N/A.</i><br>(d) If applicable, describe analytical methods taking account of sampling strategy<br><i>N/A.</i><br>(e) Describe any sensitivity analyses<br><i>N/A.</i> |
| <b>Results</b>               |         |                                                                                                                                                                                                                                                                                                                                                                                                                                                                                                                          |
| Participants                 | 13*     | (a) Report numbers of individuals at each stage of study—eg numbers potentially                                                                                                                                                                                                                                                                                                                                                                                                                                          |



1  
2  
3  
4  
5  
6  
7  
8  
9  
10  
11  
12  
13  
14  
15  
16  
17  
18  
19  
20  
21  
22  
23  
24  
25  
26  
27  
28  
29  
30  
31  
32  
33  
34  
35  
36  
37  
38  
39  
40  
41  
42  
43  
44  
45  
46  
47  
48  
49  
50  
51  
52  
53  
54  
55  
56  
57  
58  
59  
60

eligible, examined for eligibility, confirmed eligible, included in the study, completing follow-up, and analysed

[Please see page 5-6, the “Sampling and participants” section.](#)

(b) Give reasons for non-participation at each stage

N/A.

(c) Consider use of a flow diagram

[Please see page 21. The Fig 1.](#)

|                  |     |                                                                                                                                          |
|------------------|-----|------------------------------------------------------------------------------------------------------------------------------------------|
| Descriptive data | 14* | (a) Give characteristics of study participants (eg demographic, clinical, social) and information on exposures and potential confounders |
|------------------|-----|------------------------------------------------------------------------------------------------------------------------------------------|

[Please see page 18, Table 1.](#)

(b) Indicate number of participants with missing data for each variable of interest

N/A.

|              |     |                                                      |
|--------------|-----|------------------------------------------------------|
| Outcome data | 15* | Report numbers of outcome events or summary measures |
|--------------|-----|------------------------------------------------------|

[Please see page 18, Table 1.](#)

|              |    |                                                                                                                                                                                                              |
|--------------|----|--------------------------------------------------------------------------------------------------------------------------------------------------------------------------------------------------------------|
| Main results | 16 | (a) Give unadjusted estimates and, if applicable, confounder-adjusted estimates and their precision (eg, 95% confidence interval). Make clear which confounders were adjusted for and why they were included |
|--------------|----|--------------------------------------------------------------------------------------------------------------------------------------------------------------------------------------------------------------|

[Please see page 19-20, Table 2-3.](#)

(b) Report category boundaries when continuous variables were categorized

[Please see page 6-8, the “Famine severity” section, and the “Assessment of covariates” section.](#)

(c) If relevant, consider translating estimates of relative risk into absolute risk for a meaningful time period

N/A.

|                |    |                                                                                                |
|----------------|----|------------------------------------------------------------------------------------------------|
| Other analyses | 17 | Report other analyses done—eg analyses of subgroups and interactions, and sensitivity analyses |
|----------------|----|------------------------------------------------------------------------------------------------|

[Please see page 20, Table 3.](#)

## Discussion

|             |    |                                                          |
|-------------|----|----------------------------------------------------------|
| Key results | 18 | Summarise key results with reference to study objectives |
|-------------|----|----------------------------------------------------------|

[Please see page 11, the first paragraph of the “Discussion”.](#)

|             |    |                                                                                                                                                            |
|-------------|----|------------------------------------------------------------------------------------------------------------------------------------------------------------|
| Limitations | 19 | Discuss limitations of the study, taking into account sources of potential bias or imprecision. Discuss both direction and magnitude of any potential bias |
|-------------|----|------------------------------------------------------------------------------------------------------------------------------------------------------------|

[Please see page 13, the last paragraph of the “Discussion”.](#)

|                |    |                                                                                                                                                                            |
|----------------|----|----------------------------------------------------------------------------------------------------------------------------------------------------------------------------|
| Interpretation | 20 | Give a cautious overall interpretation of results considering objectives, limitations, multiplicity of analyses, results from similar studies, and other relevant evidence |
|----------------|----|----------------------------------------------------------------------------------------------------------------------------------------------------------------------------|

[Please see page 11-13, in the “Discussion”.](#)

|                  |    |                                                                       |
|------------------|----|-----------------------------------------------------------------------|
| Generalisability | 21 | Discuss the generalisability (external validity) of the study results |
|------------------|----|-----------------------------------------------------------------------|

N/A.

## Other information

|         |    |                                                                                                                                                               |
|---------|----|---------------------------------------------------------------------------------------------------------------------------------------------------------------|
| Funding | 22 | Give the source of funding and the role of the funders for the present study and, if applicable, for the original study on which the present article is based |
|---------|----|---------------------------------------------------------------------------------------------------------------------------------------------------------------|

[Please see page 14, in the “Funding” section.](#)

\*Give information separately for exposed and unexposed groups.

**Note:** An Explanation and Elaboration article discusses each checklist item and gives methodological background and published examples of transparent reporting. The STROBE checklist is best used in conjunction with this article (freely

1  
2 available on the Web sites of PLoS Medicine at <http://www.plosmedicine.org/>, Annals of Internal Medicine at  
3 <http://www.annals.org/>, and Epidemiology at <http://www.epidem.com/>). Information on the STROBE Initiative is  
4 available at [www.strobe-statement.org](http://www.strobe-statement.org).  
5  
6  
7  
8  
9  
10  
11  
12  
13  
14  
15  
16  
17  
18  
19  
20  
21  
22  
23  
24  
25  
26  
27  
28  
29  
30  
31  
32  
33  
34  
35  
36  
37  
38  
39  
40  
41  
42  
43  
44  
45  
46  
47  
48  
49  
50  
51  
52  
53  
54  
55  
56  
57  
58  
59  
60

For peer review only

# BMJ Open

## Association between the Chinese famine exposure during infant period and the risk of self-report chronic lung diseases in adulthood: a cross-sectional study

|                                 |                                                                                                                                                                                                                                                                                                                                                                                                                                                                                                                                                                                                                                             |
|---------------------------------|---------------------------------------------------------------------------------------------------------------------------------------------------------------------------------------------------------------------------------------------------------------------------------------------------------------------------------------------------------------------------------------------------------------------------------------------------------------------------------------------------------------------------------------------------------------------------------------------------------------------------------------------|
| Journal:                        | <i>BMJ Open</i>                                                                                                                                                                                                                                                                                                                                                                                                                                                                                                                                                                                                                             |
| Manuscript ID                   | bmjopen-2016-015476.R2                                                                                                                                                                                                                                                                                                                                                                                                                                                                                                                                                                                                                      |
| Article Type:                   | Research                                                                                                                                                                                                                                                                                                                                                                                                                                                                                                                                                                                                                                    |
| Date Submitted by the Author:   | 31-Mar-2017                                                                                                                                                                                                                                                                                                                                                                                                                                                                                                                                                                                                                                 |
| Complete List of Authors:       | Wang, Zhenghe; Peking University Health Science Centre, Institute of Child and Adolescent Health, School of Public Health<br>Zou, Zhi-Yong; Peking University School of Public Health, Institute of Child and Adolescent Health<br>Yang, Zhongping; Peking University Health Science Centre, Institutional addresses: Institute of Child and Adolescent Health, School of Public Health<br>Dong, Yanhui; Peking University Health Science Centre, Institute of Child and Adolescent Health, School of Public Health,<br>Ma, Jun; Peking University Health Science Center, Institute of Child and Adolescent Health, School of Public Health |
| <b>Primary Subject Heading</b>: | Public health                                                                                                                                                                                                                                                                                                                                                                                                                                                                                                                                                                                                                               |
| Secondary Subject Heading:      | Epidemiology, Respiratory medicine                                                                                                                                                                                                                                                                                                                                                                                                                                                                                                                                                                                                          |
| Keywords:                       | Famine, Developmental Origins of Health and Disease, Chronic Lung Diseases, Infant                                                                                                                                                                                                                                                                                                                                                                                                                                                                                                                                                          |
|                                 |                                                                                                                                                                                                                                                                                                                                                                                                                                                                                                                                                                                                                                             |

SCHOLARONE™  
Manuscripts

1  
2  
3  
4 1 **Association between the Chinese famine exposure during**  
5  
6 2 **infant period and the risk of self-report chronic lung diseases**  
7  
8 3 **in adulthood: a cross-sectional study**

10  
11 4 Authors: Zhenghe Wang, Zhiyong Zou, Zhongping Yang, Yanhui Dong and Jun

12  
13 5 Ma\*

14  
15  
16 6 Institutional addresses: Institute of Child and Adolescent Health, School of  
17  
18 7 Public Health, Peking University Health Science Center, Beijing, 100191,  
19  
20  
21 8 China

22  
23  
24 9 Email address:

25  
26 10 Zhenghe Wang: [18993198804@163.com](mailto:18993198804@163.com)

27  
28 11 Zhiyong Zou: [harveyzou2002@bjmu.edu.cn](mailto:harveyzou2002@bjmu.edu.cn)

29  
30 12 Zhongping Yang: [benyoungsichuan@163.com](mailto:benyoungsichuan@163.com)

31  
32 13 Yanhui Dong: [18811508639@163.com](mailto:18811508639@163.com)

33  
34 14 Jun Ma: [majunt@bjmu.edu.cn](mailto:majunt@bjmu.edu.cn)

35  
36  
37  
38  
39 15 \* **Corresponding Authors:** Jun Ma, Ph.D., Professor, Institute of Child and  
40  
41 16 Adolescent Health, School of public health Peking University Health Science  
42  
43 17 Center, No 38 Xue Yuan Road, Haidian District, Beijing, 100191, China. Tel:  
44  
45 18 +86-10-82801624 Fax: +86-10-82801178, Email: [majunt@bjmu.edu.cn](mailto:majunt@bjmu.edu.cn).

## Abstract

**Objective** This study aimed to examine the associations between early-life exposed to the Chinese famine and the risk of chronic lung diseases in adulthood.

**Design** Data analysis from a cross-sectional survey.

**Setting and participants** 4,135 subjects were enrolled into the study from the China Health and Retirement Longitudinal Study (CHARLS) 2011-2012 baseline survey to analyze the associations between prenatal and early postnatal famine exposure and the risk of chronic lung diseases in adulthood.

**Main outcome measures** Chronic lung diseases were defined based on the self-report information.

**Results** The prevalence of self-report chronic lung diseases in fetus-exposed, infant-exposed, preschool-exposed and non-exposed groups was 6.1%, 6.5%, 7.9% and 6.8%, respectively. The risk of chronic lung diseases in the infant-exposed group was significantly higher (OR=1.95, 95% CI: 1.10-3.44) than the non-exposed group in severely affected areas, even after adjusting for gender, smoking, and drinking, family economic status, and the highest education attainment of parents (OR=2.57, 95% CI: 1.26-5.25). In addition, after stratified by gender and famine severity, we found that only infant exposure to the severe famine was associated with the elevated risk of chronic lung diseases among male adults (OR=3.16, 95% CI: 1.17-8.51).

1  
2  
3  
4 40 **Conclusions** Severe famine exposure in infant period might increase the  
5  
6 41 risk of chronic lung diseases in male adults.  
7  
8

9  
10 42 **Strengths and limitations of this study**  
11

12  
13 43 ● This study evaluated the associations between prenatal and early  
14  
15 44 postnatal exposure to the Chinese famine and the risk of chronic lung  
16  
17 45 diseases in adulthood, which were unclear in previous studies.  
18

19  
20  
21 46 ● The present study using the China Health and Retirement Longitudinal  
22  
23 47 Study 2011-2012 baseline survey that covered all geographical regions in  
24  
25 48 China and had broadly representative of entire China mainland found  
26  
27 49 infant exposure to the severe Chinese famine increased the risk of chronic  
28  
29 50 lung diseases in male adults.  
30  
31

32  
33  
34 51 ● Selection bias was unavoidable, because severe famine could eliminate  
35  
36 52 the weaker participants, and remain the healthier participants, which may  
37  
38 53 decrease the real effects of famine exposure.  
39  
40

41  
42 54 ● Self-report prevalence based on doctor diagnosis could be lower than the  
43  
44 55 real prevalence of chronic lung diseases, and could underestimate the  
45  
46 56 effects of famine exposure.  
47  
48

49  
50 57 **Key words:** Famine; Developmental Origins of Health and Disease;  
51  
52 58 Chronic Lung Diseases; Infant  
53  
54

55  
56 59 **Introduction**  
57  
58  
59  
60

1  
2  
3  
4 60 The chronic lung diseases briefly include chronic obstructive lung diseases  
5  
6 61 (COPDs), chronic bronchitis, bronchial asthma, and lung heart disease  
7  
8  
9 62 (excluding lung tumors). Global Status Report on Non-Communicable  
10  
11 63 Diseases (NCDs) showed that respiratory diseases, including asthma and  
12  
13 64 chronic obstructive lung diseases were the third leading cause of NCDs deaths  
14  
15 65 in 2012 (about four million)[1]. Especially in the developing countries, the  
16  
17 66 burden of chronic lung diseases was heavier than that in the developed  
18  
19 67 countries[2].  
20  
21  
22  
23

24 68 The Development of Health and Disease theory speculated that the fetus in  
25  
26 69 utero would change their growth rate to adapt the condition of nutrients and  
27  
28 70 oxygen. However, several studies had found that these adaptive changes  
29  
30 71 might permanently modify the structure and physiological function of fetus[3, 4].  
31  
32  
33 72 The heavier lung diseases burden in the developing countries might be  
34  
35 73 associated with higher prevalence of low birth weight than that in the  
36  
37 74 developed countries. Several studies had found that the low birth weight was a  
38  
39 75 strong factor to predict reduction of forced expiratory vital capacity(FEV) and  
40  
41 76 forced vital capacity(FVC)[5-7]. Moreover, although some studies found that  
42  
43 77 the low birth weight increased the risk of asthma[8-12] and the mortality of  
44  
45 78 chronic obstructive lung disease[7], no consistent results was observed in  
46  
47 79 previous studies[13-16].  
48  
49  
50  
51  
52  
53  
54

55 80 Due to ethical limitations, we cannot perform the similar research in human  
56  
57 81 beings, but natural historical famines provided us a unique opportunity to  
58  
59  
60

1  
2  
3  
4 82 examine the DOHaD hypothesis in human beings. The Dutch famine  
5  
6 83 happened in the west of the Netherlands at the end of the World War II, it  
7  
8  
9 84 lasted for about six months. One study observed that mid-gestation exposure  
10  
11 85 to the Dutch famine increased significantly the prevalence of obstructive  
12  
13 86 airways disease in adulthood[17]. Compared with the Dutch famine, the  
14  
15  
16 87 Chinese famine happened in the east of Asia, starting in the end of 1950 and  
17  
18 88 ending in the early of 1960, which lasted for about three years. A majority of  
19  
20 89 studies have found that early-life exposure to the Chinese famine linked with  
21  
22 90 hypertension[18], diabetes[19], metabolic syndrome[20] in adulthood, but the  
23  
24 91 associations with chronic lung diseases are still unclear.  
25  
26  
27  
28

29 92 In the current study, we used the public data of the China Health and  
30  
31 93 Retirement Longitudinal Study (CHARLS) 2011-2012 baseline survey, to  
32  
33 94 examine the associations between the Chinese famine exposure in early life  
34  
35 95 and the prevalence of chronic lung diseases in adulthood, and further to  
36  
37 96 explore whether the associations were gender-specific.  
38  
39  
40  
41

## 42 97 **Methods**

### 43 98 **Sampling and participants**

44  
45  
46 99 Sampling in the present study was based on a national population-based  
47  
48  
49 100 longitudinal survey in 2011-2012 of CHARLS[21]. A total of 17,708 adults aged  
50  
51 101  $\geq 45$  years old from 10,257 households were randomly selected to receive the  
52  
53  
54 102 household survey among 150 counties, 28 provinces, and autonomous  
55  
56  
57  
58  
59  
60



1  
2  
3  
4 103 regions of China mainland. 4,182 participants out of 17,708 adults were  
5  
6 104 screened by birthdate into the present study. After excluding 47 subjects with  
7  
8  
9 105 information missing of chronic lung diseases, 4,135 subjects were enrolled into  
10  
11 106 our final analysis (Fig 1).

## 107 **Sampling and grouping**

108 Participants were divided into the non-exposed group and three  
109 famine-exposed groups (fetus, infant, and preschool-exposed groups). The  
110 Chinese famine began in January 1959 and ended in October 1961, and in  
111 order to minimize the misclassification of the famine exposure, we defined the  
112 participants born between October 1, 1962 and September 30, 1964 as the  
113 non-exposed group, the participants born between October 1, 1959 and  
114 September 30, 1961 as the fetal-exposed group, the participants born between  
115 January 1, 1958 and December 31, 1958 as the infant-exposed group, and  
116 defined the participants born between January 1, 1956 and December 31,  
117 1957 as the preschool-exposed group.

## 118 **Famine severity**

119 Despite the Chinese famine affected the entire China mainland, the severity  
120 was at different levels across provinces due to the difference of regional  
121 climate, population density and local food policies. Similar to the previous  
122 studies[18, 19], we also used the excess mortality during 1959-1961 compared  
123 with the 1956-1958 to evaluate of the severity of the famine in the present

1  
2  
3  
4 124 study, and 100% was used as the threshold of excess mortality to distinguish  
5  
6 125 the severity of famine exposure. The regions with excess mortality  $\geq 100\%$   
7  
8  
9 126 were categorized as the severely affected areas, and otherwise were  
10  
11 127 categorized as the less severely affected areas.

## 128 **Measurements**

### 129 **Diagnosis of chronic lung diseases**

130 In this study, data were collected through household survey by investigators  
131 who received unified training and passed the examination. The diagnosis of  
132 chronic lung diseases was based on the question of "Have you been  
133 diagnosed with chronic lung diseases, such as chronic bronchitis, emphysema  
134 (excluding tumors, or cancer) by a doctor? ". Subjects answering "Yes" were  
135 defined as persons suffering from chronic lung diseases, and subjects  
136 answering "No" as those who did not suffer from chronic lung diseases.

### 137 **Assessment of covariates**

138 The social demographic information, family economic status, the highest  
139 education attainment of parents, and lifestyle information including smoking  
140 status, drinking status were collected during face-to-face interviews in house  
141 by trained interviewers. The highest education attainments of parents was  
142 categorized into 4 levels: primary school or below, junior school, senior school,  
143 and college or above. Smoking status was classified into never smoking,  
144 former smoking, and current smoking (who smoked at least 1 cigarette per day

1  
2  
3  
4 145 in the last year). Drinking status was classified into never drinking, former  
5  
6 146 drinking, and current drinking (who drunk at least once per week in the last  
7  
8  
9 147 year). The mean level of the present sample (12,744 Chinese Yuan per person  
10  
11 148 per year) was used as cutoff point for family economic status (high vs. low  
12  
13  
14 149 income).

## 150 **Analysis**

151 Statistical analyses were preformed using IBM SPSS 20.0 (IBM Corporation,  
152 Armonk, NY, USA). Continuous and categorical variables were expressed as  
153 mean  $\pm$  standard deviation and percentage (%), respectively.

154 The Chi-square test was used to compare the difference of chronic lung  
155 diseases prevalence between the non-exposed group and famine-exposed  
156 group.

157 Univariate and multivariable logistic regression models by the maximum  
158 likelihood method were used to examine the risk of chronic lung diseases  
159 among the fetus, infant, and preschool-exposed groups, compared with the  
160 non-exposed group, respectively. In multivariable logistic regression model, we  
161 adjusted for gender, smoking, drinking, family economic status, and the  
162 highest education attainment of parents. Interactions between famine-exposed  
163 groups (fetus, infant, or preschool vs. non-exposed) and areas (severely  
164 affected vs. less severely affected) were tested by adding a multiplicative  
165 factor in the logistic regression model.

1  
2  
3  
4 166 In order to explore whether there exists a gender difference, stratified analysis  
5  
6 167 by gender was performed using the same methods. Data was expressed as  
7  
8  
9 168 odds ratio (OR) (95% confidence interval).

10  
11  
12 169  $P < 0.05$  for two-sided was considered statistically significant for all the  
13  
14 170 analysis.

## 171 **Ethics**

172 Our study is a secondary analysis of the de-identified CHARLS public data.  
173 The Medical Ethics Committee of Peking University granted the current study  
174 exemption from review. All the subjects were informed and consented for the  
175 protocol of study.

## 176 **Results**

177 The basic characteristics of participants were shown in **Table 1**. A total of  
178 4,135 participants were enrolled into the present study. The sample sizes of  
179 the non-exposed, fetus, infant, and preschool-exposed groups were 1,536,  
180 834, 518, and 1,247, respectively. The prevalence of chronic lung diseases for  
181 the non-exposed, fetus, infant, and preschool exposed groups were 6.1%,  
182 6.5%, 7.9%, and 6.8%, respectively. we did not observe a statistically  
183 significant difference of Chronic lung diseases prevalence among four groups  
184 ( $P=0.511$ ).

185 Stratified analysis by famine severity was showed in **Table 2**. Compared with  
186 the non-exposed group, only the prevalence of chronic lung diseases for the

1  
2  
3  
4 187 infant-exposed group was significantly higher in severely affected area (5.6%  
5  
6 188 vs.10.4%). Stratified by severity of famine exposure, we found that subjects in  
7  
8 189 the infant-exposed group were at a higher risk of chronic lung diseases than  
9  
10 190 the non-exposed group in severely affected area (OR=1.95; 95% CI: 1.10,  
11  
12 191 3.44), even after adjusting for gender, smoking, drinking, family economic  
13  
14 192 status, and the highest education attainment (OR=2.57; 95% CI: 1.26, 5.25).  
15  
16 193 However, we did not observe the consistent associations in other  
17  
18 194 famine-exposed groups and in less severely affected areas. In addition, we did  
19  
20 195 not observe any significant interactions between famine exposure groups  
21  
22 196 (fetus, infant, or preschool vs. non-exposed) and areas (severely affected vs.  
23  
24 197 less severely affected).

25  
26  
27  
28  
29  
30  
31  
32 198 **Table 3** presents the results of stratified analysis by gender and famine  
33  
34 199 severity. In males, we observed that the infant-exposed group (OR=3.16; 95%  
35  
36 200 CI: 1.17, 8.51) significantly increased the risk of chronic lung diseases in  
37  
38 201 severely affected area, compared with the non-exposed group. The consistent  
39  
40 202 associations were not observed in fetal and preschool-exposed groups and in  
41  
42 203 less severely affected area. In females, we did not observe any significant  
43  
44 204 associations between famine exposed groups and the non-exposed group.  
45  
46 205 Any significant interactions were not observed between famine exposed  
47  
48 206 groups (fetus, infant, or preschool vs. non-exposed) and areas (severely  
49  
50 207 affected vs. less severely affected) neither males nor females. The effects of  
51  
52 208 main covariates, including smoking, drinking, parents` education attainment,  
53  
54  
55  
56  
57  
58  
59  
60

1  
2  
3  
4 209 and family economic status on chronic lung diseases were showed in  
5  
6 210 **Supplementary Table 1** stratified by gender and severity.  
7  
8

## 9 211 **Discussion**

10  
11  
12 212 In the current study, we observed that the infant exposure to the Chinese  
13  
14 213 famine significantly increased the risk of chronic lung diseases in later life.  
15  
16  
17 214 After stratifying by gender and famine severity, we found only the infant  
18  
19 215 exposure to severe famine significantly increased the risk of chronic lung  
20  
21 216 diseases in male adults, indicating that the infant period might be a critical  
22  
23 217 period for human lung structure and function development.  
24  
25  
26

27  
28 218 Several mechanisms could explain the associations. 1) Early-life exposure to  
29  
30 219 the severe famine might perpetually modify the bronchial reactivity during rapid  
31  
32 220 growth. One Dutch famine study found that gestation the famine exposure  
33  
34 221 affected neither the concentrations of total or specific IgE nor lung function  
35  
36 222 values (FEV<sub>1</sub> and FVC), but they observed a significant associations between  
37  
38 223 exposure to famine in mid and early gestation and obstructive airways disease  
39  
40 224 in adulthood[17]. The results indicated that famine exposure might not change  
41  
42 225 the lung function and atopic disease, but could permanently modify the  
43  
44 226 bronchial responsiveness. Though we could not assure the assumption  
45  
46 227 because bronchial reactivity was not measured in this study, this assumption  
47  
48 228 can be one way to explain the mechanism. 2) Severe malnutrition during early  
49  
50 229 life might increase susceptibility to pulmonary injury in later life. Animal model  
51  
52  
53  
54  
55  
56  
57  
58  
59  
60

1  
2  
3  
4 230 study had found that young animals who were exposed to a low protein  
5  
6 231 maternal diet in fetus were more likely to suffer pulmonary injury than  
7  
8  
9 232 non-exposed young animals, which indicated the programming of the  
10  
11 233 antioxidant defenses and immune system[22]. Another animal study reported  
12  
13  
14 234 that fetuses exposed to a low protein diet significantly decreased the binding of  
15  
16 235 dexamethasone to lung receptors[23].  
17

18  
19 236 The present study further added the new direct evidence in human beings for  
20  
21 237 the fetus origin of diseases. To our knowledge, only one Dutch study explored  
22  
23 238 the associations between the early-life famine exposure and atopy, lung  
24  
25 239 function, and obstructive airways disease, and found that the famine exposure  
26  
27 240 in mid and early gestation might significantly increase the prevalence of  
28  
29 241 obstructive airways disease. Results of the Dutch study were inconsistent with  
30  
31 242 the current study. In this study, we found that only the severe famine exposure  
32  
33 243 in infant stage significantly increased the risk of chronic lung diseases in  
34  
35 244 adulthood. Several reasons could explain the difference. Firstly, race might be  
36  
37 245 a main reason between the two studies. Subjects in the Dutch study came  
38  
39 246 from White European, while subjects in this study were from Asian. Secondly,  
40  
41 247 severity and duration could be another important discrepancy. The Dutch  
42  
43 248 famine only lasted for about six months, while the Chinese famine lasted for  
44  
45 249 about three years. Furthermore, the Chinese famine led to approximately thirty  
46  
47 250 millions premature death[24]. However, the mortality rate during famine period  
48  
49 251 (1945) was more than twice as high as that in 1939, and most of the excess  
50  
51  
52  
53  
54  
55  
56  
57  
58  
59  
60

1  
2  
3  
4 252 mortality was attributed to severe malnutrition[25].  
5  
6

7 253 It was interesting that we observed the severe famine exposure in infant period  
8  
9 254 significantly increased the risk of chronic lung diseases among men, but not  
10  
11 255 among women, which seems to be contradictory to the severity of famine  
12  
13 256 exposure. Chinese parents have held a profound and lasting tradition of  
14  
15 257 “Preferring boys to girls”, and thus boys may have been protected better  
16  
17 258 against the famine by parents. It was inconsistent with metabolic syndrome[26].  
18  
19 259 We speculated that boy’s lungs development could be more sensitive to  
20  
21 260 severely malnutrition in early-life. But the specific mechanisms need to be  
22  
23 261 further explored in future study.  
24  
25  
26  
27  
28  
29

30 262 There are several limitations in this study. The primary limitation is the  
31  
32 263 selection bias. Severe famine could eliminate weaker participants, and remain  
33  
34 264 the healthier participants, which may decrease the real effect of famine  
35  
36 265 exposure. Secondly, similar to other the Chinese famine studies[18, 19, 27],  
37  
38 266 the present study also lacked the objective indicators that reflected the severity  
39  
40 267 of famine exposure, e.g. birth weight, birth body length. Thirdly, because both  
41  
42 268 bad weather and infection in early-life could increase the risk of chronic lung  
43  
44 269 diseases, we could not attribute all the excess mortality rate to the famine  
45  
46 270 exposure. In addition, we cannot separate the effect of age from famine  
47  
48 271 exposure. Despite these limitations, the present study used the data of China  
49  
50 272 Health and Retirement Longitudinal Study 2011-2012 baseline survey that has  
51  
52 273 broad representative of entire China mainland, and found that infant exposure  
53  
54  
55  
56  
57  
58  
59  
60



1  
2  
3  
4 274 to severe famine significantly increased the risk of chronic lung disease among  
5  
6 275 men.  
7  
8

## 9 276 **Conclusions**

10  
11  
12 277 Infant exposure to severe famine could increase the risk of chronic lung  
13  
14 278 diseases in male adults, indicating that the infant stage might be the critical  
15  
16  
17 279 period of lungs development for men.  
18  
19

## 20 280 **Footnotes**

21  
22  
23  
24 281 **Contributors** JM and ZW were co-investigators and designed the study, ZW,  
25  
26 282 ZZ, ZY and YD carried out the initial analysis, and supervised data  
27  
28  
29 283 analysis. All authors were involved in writing the paper and had final approval  
30  
31 284 of the submitted and published versions.  
32  
33

34 285 **Funding** This work was supported by National Science Foundation of China  
35  
36 286 (NSFC 81402692).  
37  
38  
39

40 287 **Competing interests** The authors declared that they had no competing  
41  
42 288 interests.  
43  
44

45  
46 289 Our study is a secondary analysis of the de-identified CHARLS public data.  
47  
48 290 The Medical Ethics Committee of Peking University granted the current study  
49  
50 291 exemption from review. All the subjects were informed and consented for the  
51  
52 292 protocol of study.  
53  
54

## 55 293 **Consent for publication**

1  
2  
3  
4 294 Not applicable.  
5  
6

7 295 **Availability of data and material**  
8  
9

10 296 The datasets analyzed in the current study are available in the  
11  
12 297 <http://charls.pku.edu.cn/zh-CN/page/data/2011-charls-wave1>.  
13  
14

15 298 **Acknowledgements**  
16  
17

18 299 We would like to acknowledge the team of China Health and Retirement  
19  
20 300 Longitudinal Study (CHARLS) 2011-2012 baseline survey. We are grateful to  
21  
22 301 all the participants who participated in the baseline survey for their labor, and  
23  
24 302 we also acknowledge all the subjects and households that participated in the  
25  
26 303 survey for their cooperation.  
27  
28  
29  
30  
31

32 304 **Reference**  
33

- 34 305 1. Zhou M, Wang H, Zhu J, Chen W, Wang L, Liu S, et al. Cause-specific  
35 306 mortality for 240 causes in China during 1990-2013: a systematic subnational  
36 307 analysis for the Global Burden of Disease Study 2013. *Lancet*. 2016 Jan  
37 308 16;387(10015):251-72. doi: 10.1016/S0140-6736(15)00551-6.  
38 309 2. Global Burden of Disease Study C. Global, regional, and national  
39 310 incidence, prevalence, and years lived with disability for 301 acute and chronic  
40 311 diseases and injuries in 188 countries, 1990-2013: a systematic analysis for  
41 312 the Global Burden of Disease Study 2013. *Lancet*. 2015 Aug  
42 313 22;386(9995):743-800. doi: 10.1016/S0140-6736(15)60692-4.  
43 314 3. Li J, Na L, Ma H, Zhang Z, Li T, Lin L, et al. Multigenerational effects  
44 315 of parental prenatal exposure to famine on adult offspring cognitive function.  
45 316 *Scientific reports*. 2015;5:13792. doi: 10.1038/srep13792.  
46 317 4. Wadhwa PD, Buss C, Entringer S, Swanson JM. Developmental  
47 318 origins of health and disease: brief history of the approach and current focus  
48 319 on epigenetic mechanisms. *Seminars in reproductive medicine*. 2009  
49 320 Sep;27(5):358-68. doi: 10.1055/s-0029-1237424.  
50  
51  
52  
53  
54  
55  
56  
57  
58  
59  
60

- 1  
2  
3 321 5. Stein CE, Kumaran K, Fall CH, Shaheen SO, Osmond C, Barker DJ.  
4 322 Relation of fetal growth to adult lung function in south India. *Thorax*. 1997  
5 323 *Oct*;52(10):895-9.  
6  
7 324 6. Rona RJ, Gulliford MC, Chinn S. Effects of prematurity and  
8 325 intrauterine growth on respiratory health and lung function in childhood. *Bmj*.  
9 326 1993 *Mar 27*;306(6881):817-20.  
10  
11 327 7. Barker DJ, Godfrey KM, Fall C, Osmond C, Winter PD, Shaheen SO.  
12 328 Relation of birth weight and childhood respiratory infection to adult lung  
13 329 function and death from chronic obstructive airways disease. *Bmj*. 1991 *Sep*  
14 330 *21*;303(6804):671-5.  
15  
16 331 8. Shaheen SO, Sterne JA, Montgomery SM, Azima H. Birth weight,  
17 332 body mass index and asthma in young adults. *Thorax*. 1999  
18 333 *May*;54(5):396-402.  
19  
20 334 9. Slezak JA, Persky VW, Kviz FJ, Ramakrishnan V, Byers C. Asthma  
21 335 prevalence and risk factors in selected Head Start sites in Chicago. *The*  
22 336 *Journal of asthma : official journal of the Association for the Care of Asthma*.  
23 337 1998;35(2):203-12.  
24  
25 338 10. Schaebel D, Johansen H, Dutta M, Desmeules M, Becker A, Mao Y.  
26 339 Neonatal characteristics as risk factors for preschool asthma. *The Journal of*  
27 340 *asthma : official journal of the Association for the Care of Asthma*.  
28 341 1996;33(4):255-64.  
29  
30 342 11. Oliveti JF, Kercksmar CM, Redline S. Pre- and perinatal risk factors for  
31 343 asthma in inner city African-American children. *Am J Epidemiol*. 1996 *Mar*  
32 344 *15*;143(6):570-7.  
33  
34 345 12. Arshad SH, Stevens M, Hide DW. The effect of genetic and  
35 346 environmental factors on the prevalence of allergic disorders at the age of two  
36 347 years. *Clinical and experimental allergy : journal of the British Society for*  
37 348 *Allergy and Clinical Immunology*. 1993 *Jun*;23(6):504-11.  
38  
39 349 13. Shaheen SO, Sterne JA, Tucker JS, Florey CD. Birth weight,  
40 350 childhood lower respiratory tract infection, and adult lung function. *Thorax*.  
41 351 1998 *Jul*;53(7):549-53.  
42  
43 352 14. Sears MR, Holdaway MD, Flannery EM, Herbison GP, Silva PA.  
44 353 Parental and neonatal risk factors for atopy, airway hyper-responsiveness, and  
45 354 asthma. *Arch Dis Child*. 1996 *Nov*;75(5):392-8.  
46  
47 355 15. Matthes JW, Lewis PA, Davies DP, Bethel JA. Birth weight at term  
48 356 and lung function in adolescence: no evidence for a programmed effect. *Arch*  
49 357 *Dis Child*. 1995 *Sep*;73(3):231-4.  
50  
51  
52  
53  
54  
55  
56  
57  
58  
59  
60

- 1  
2  
3 358 16. Kelly YJ, Brabin BJ, Milligan P, Heaf DP, Reid J, Pearson MG.  
4 359 Maternal asthma, premature birth, and the risk of respiratory morbidity in  
5 360 schoolchildren in Merseyside. *Thorax*. 1995 May;50(5):525-30.  
6  
7 361 17. Lopuhaa CE, Roseboom TJ, Osmond C, Barker DJ, Ravelli AC,  
8 362 Bleker OP, et al. Atopy, lung function, and obstructive airways disease after  
9 363 prenatal exposure to famine. *Thorax*. 2000 Jul;55(7):555-61.  
10  
11 364 18. Li Y, Jaddoe VW, Qi L, He Y, Lai J, Wang J, et al. Exposure to the  
12 365 Chinese famine in early life and the risk of hypertension in adulthood. *Journal*  
13 366 *of hypertension*. 2011 Jun;29(6):1085-92. doi:  
14 367 10.1097/HJH.0b013e328345d969.  
15  
16 368 19. Li Y, He Y, Qi L, Jaddoe VW, Feskens EJ, Yang X, et al. Exposure to  
17 369 the Chinese famine in early life and the risk of hyperglycemia and type 2  
18 370 diabetes in adulthood. *Diabetes*. 2010 Oct;59(10):2400-6. doi:  
19 371 10.2337/db10-0385.  
20  
21 372 20. Li Y, Jaddoe VW, Qi L, He Y, Wang D, Lai J, et al. Exposure to the  
22 373 chinese famine in early life and the risk of metabolic syndrome in adulthood.  
23 374 *Diabetes Care*. 2011 Apr;34(4):1014-8. doi: 10.2337/dc10-2039.  
24  
25 375 21. Zhao Y, Hu Y, Smith JP, Strauss J, Yang G. Group profile: the China  
26 376 Health and Retirement Longitudinal Study (CHARLS). *International journal of*  
27 377 *epidemiology*. 2014;43(1):61-8.  
28  
29 378 22. Langley-Evans SC, Phillips GJ, Jackson AA. Fetal exposure to low  
30 379 protein maternal diet alters the susceptibility of young adult rats to sulfur  
31 380 dioxide-induced lung injury. *J Nutr*. 1997 Feb;127(2):202-9.  
32  
33 381 23. Mulay S, Browne CA, Varma DR, Solomon S. Placental hormones,  
34 382 nutrition, and fetal development. *Federation proceedings*. 1980  
35 383 Feb;39(2):261-5.  
36  
37 384 24. Cai Y, Feng W. Famine, social disruption, and involuntary fetal loss:  
38 385 evidence from Chinese survey data. *Demography*. 2005 May;42(2):301-22.  
39  
40 386 25. Banning C. Food Shortage and Public Health, First Half of 1945.  
41 387 *Annals of the American Academy of Political & Socialence*.  
42 388 1946;245(2):93-110.  
43  
44 389 26. Zheng X, Wang Y, Ren W, Luo R, Zhang S, Zhang JH, et al. Risk of  
45 390 metabolic syndrome in adults exposed to the great Chinese famine during the  
46 391 fetal life and early childhood. *Eur J Clin Nutr*. 2012 Feb;66(2):231-6. doi:  
47 392 10.1038/ejcn.2011.161.  
48  
49 393 27. Wang Z, Li C, Yang Z, Zou Z, Ma J. Infant exposure to Chinese  
50 394 famine increased the risk of hypertension in adulthood: results from the China  
51 395 Health and Retirement Longitudinal Study. *BMC public health*. 2016;16(1):435.  
52 396 doi: 10.1186/s12889-016-3122-x.  
53  
54  
55  
56  
57  
58  
59  
60

397 **Table 1** Basic characteristics of study population according to the Chinese  
 398 famine exposure

| Variances                              | Non-exposed group       | Fetal-exposed group     | Infant-exposed group   | Preschool-exposed group | <i>P</i> value  |
|----------------------------------------|-------------------------|-------------------------|------------------------|-------------------------|-----------------|
| Birth date                             | 10/1/1962–<br>9/30/1964 | 10/1/1959–<br>9/30/1961 | 19581/1–<br>12/31/1958 | 1/1/1956–<br>12/31/1957 |                 |
| N                                      | 1,536                   | 834                     | 518                    | 1,247                   |                 |
| Age in 2011(years)                     | 47~49                   | 50~51                   | 53                     | 54~55                   |                 |
| Born in severely affected area, n (%)  | 657(42.8)               | 269(32.3)               | 192(37.1)              | 482(38.7)               | <i>P</i> <0.001 |
| Women, n (%)                           | 801(52.2)               | 438(52.6)               | 241(46.5)              | 614(49.3)               | <i>P</i> =0.067 |
| Smoking, n (%)                         |                         |                         |                        |                         | <i>P</i> =0.014 |
| Never                                  | 970(66.4)               | 519(65.1)               | 297(61.4)              | 711(59.8)               |                 |
| Former                                 | 80(5.5)                 | 36(4.5)                 | 28(5.8)                | 77(6.5)                 |                 |
| Current                                | 410(28.1)               | 242(30.4)               | 159(32.9)              | 400(33.7)               |                 |
| Drinking, n (%)                        |                         |                         |                        |                         | <i>P</i> =0.614 |
| Never                                  | 948(61.8)               | 513(61.6)               | 320(61.9)              | 787(63.2)               |                 |
| Less than once per months              | 155(10.1)               | 82(9.8)                 | 53(10.3)               | 100(8.0)                |                 |
| More than once per months              | 430(28.0)               | 238(28.6)               | 144(27.9)              | 359(28.8)               |                 |
| Family income, n (%)                   |                         |                         |                        |                         | <i>P</i> =0.960 |
| High                                   | 199(54.4)               | 115(53.5)               | 65(52.4)               | 143(52.4)               |                 |
| Low                                    | 167(45.6)               | 100(46.5)               | 59(47.6)               | 130(47.6)               |                 |
| Education, n (%)                       |                         |                         |                        |                         | <i>P</i> =0.390 |
| Primary school and below               | 695(89.7)               | 396(89.8)               | 246(88.8)              | 567(92.5)               |                 |
| Junior school                          | 40(5.2)                 | 27(6.1)                 | 16(5.8)                | 25(4.1)                 |                 |
| High school                            | 31(4.0)                 | 12(2.7)                 | 10(3.6)                | 19(3.1)                 |                 |
| College and above                      | 9(1.2)                  | 6(1.4)                  | 5(1.8)                 | 2(0.3)                  |                 |
| Prevalence of chronic lung disease (%) | 6.1                     | 6.5                     | 7.9                    | 6.8                     | <i>P</i> =0.511 |

399

400 **Table 2** The risk of chronic lung diseased among three exposed groups compare with the  
 401 non-exposed group.

| Variances                                               | Non-exposed group | Fetal-exposed group | Infant-exposed group | Preschool-exposed group |
|---------------------------------------------------------|-------------------|---------------------|----------------------|-------------------------|
| Severely affected famine area                           |                   |                     |                      |                         |
| Prevalence (%)                                          | 5.6               | 5.6                 | 10.4                 | 5.6                     |
| $P^a$                                                   |                   | 0.973               | 0.022                | 0.983                   |
| Odds ratio (95% CI) <sup>a</sup>                        | Ref.              | 0.99(0.53-1.84)     | 1.95(1.10-3.44)      | 0.99(0.60-1.66)         |
| $P^b$                                                   |                   | 0.953               | 0.009                | 0.437                   |
| Odds ratio (95% CI) <sup>b</sup>                        | Ref.              | 0.98(0.43-2.20)     | 2.57(1.26-5.25)      | 0.75(0.36-1.56)         |
| Less severely affected famine area                      |                   |                     |                      |                         |
| Prevalence (%)                                          | 6.4               | 6.9                 | 6.4                  | 7.6                     |
| $P^a$                                                   |                   | 0.691               | 0.964                | 0.336                   |
| Odds ratio (95% CI) <sup>a</sup>                        | Ref.              | 1.09(0.71-1.66)     | 1.01(0.60-1.70)      | 1.21(0.82-1.76)         |
| $P^b$                                                   |                   | 0.254               | 0.398                | 0.471                   |
| Odds ratio (95% CI) <sup>b</sup>                        | Ref.              | 1.38(0.79-2.41)     | 1.33(0.69-3.56)      | 1.22(0.71-2.10)         |
| $P$ for interaction between area and group <sup>a</sup> | Ref.              | 0.468               | 0.109                | 0.178                   |
| $P$ for interaction between area and group <sup>b</sup> | Ref.              | 0.421               | 0.061                | 0.223                   |

402 <sup>a</sup> Single variance binary logistic regression model.

403 <sup>b</sup> Multivariable logistic regression model, adjusted for gender, smoking, drinking, family  
 404 economic status and the highest education attainment of parents.

405

406 **Table 3** Prevalence rate of chronic lung diseases by gender, birth group and severity of  
 407 the Chinese famine area

| Variables                                                  | Non-exposed group | Fetal-exposed group | Infant-exposed group | Preschool-exposed group |
|------------------------------------------------------------|-------------------|---------------------|----------------------|-------------------------|
| <b>Female</b>                                              |                   |                     |                      |                         |
| <b>Severely affected area</b>                              |                   |                     |                      |                         |
| Prevalence (%)                                             | 5.0               | 5.3                 | 7.5                  | 4.7                     |
| $P^a$                                                      |                   | 0.907               | 0.359                | 0.861                   |
| Odds ratio (95% CI) <sup>a</sup>                           | Ref.              | 1.05(0.44-2.50)     | 1.53(0.62-3.81)      | 0.93(0.43-2.03)         |
| $P^b$                                                      |                   | 0.514               | 0.208                | 0.479                   |
| Odds ratio (95% CI) <sup>b</sup>                           | Ref.              | 1.39(0.52-3.74)     | 1.98(0.68-5.72)      | 0.67(0.23-2.01)         |
| <b>Less severely affected area</b>                         |                   |                     |                      |                         |
| Prevalence (%)                                             | 6.9               | 7.0                 | 4.1                  | 9.4                     |
| $P^a$                                                      |                   | 0.970               | 0.218                | 0.176                   |
| Odds ratio (95% CI) <sup>a</sup>                           | Ref.              | 1.01(0.57-1.81)     | 0.57(0.23-1.39)      | 1.41(0.86-2.32)         |
| $P^b$                                                      |                   | 0.238               | 0.644                | 0.359                   |
| Odds ratio (95% CI) <sup>b</sup>                           | Ref.              | 1.55(0.75-3.23)     | 0.77(0.24-2.39)      | 1.40(0.68-2.89)         |
| $P$ for interaction between area and group <sup>a</sup>    | Ref.              | 0.498               | 0.252                | 0.036                   |
| $P$ for interaction between smoking and group <sup>a</sup> | Ref.              | 0.907               | 0.003                | 0.028                   |
| $P$ for interaction between area and group <sup>b</sup>    | Ref.              | 0.686               | 0.179                | 0.132                   |
| $P$ for interaction between smoking and group <sup>b</sup> | Ref.              | 0.999               | 0.614                | 0.0628                  |
| <b>Male</b>                                                |                   |                     |                      |                         |
| <b>Severely affected area</b>                              |                   |                     |                      |                         |
| Prevalence (%)                                             | 6.3               | 5.9                 | 13.1                 | 6.5                     |
| $P^a$                                                      |                   | 0.897               | 0.030                | 0.930                   |
| Odds ratio (95% CI) <sup>a</sup>                           | Ref.              | 0.94(0.39-2.29)     | 2.26(1.08-4.73)      | 1.03(0.52-3.03)         |
| $P^b$                                                      |                   | 0.677               | 0.023                | 0.686                   |
| Odds ratio (95% CI) <sup>b</sup>                           | Ref.              | 0.75(0.20-2.87)     | 3.16(1.17-8.51)      | 0.81(0.30-2.22)         |
| <b>Less severely affected area</b>                         |                   |                     |                      |                         |
| Prevalence (%)                                             | 5.8               | 6.9                 | 8.4                  | 5.7                     |
| $P^a$                                                      |                   | 0.566               | 0.237                | 0.974                   |
| Odds ratio (95% CI) <sup>a</sup>                           | Ref.              | 1.20(0.64-2.24)     | 1.50(0.77-2.93)      | 0.99(0.55-1.80)         |
| $P^b$                                                      |                   | 0.584               | 0.178                | 0.853                   |
| Odds ratio (95% CI) <sup>b</sup>                           | Ref.              | 1.28(0.53-3.07)     | 1.82(0.76-4.36)      | 1.08(0.45-2.60)         |
| $P$ for interaction between area and group <sup>a</sup>    | Ref.              | 0.734               | 0.217                | 0.709                   |
| $P$ for interaction between smoking and group <sup>a</sup> | Ref.              | 0.409               | 0.300                | 0.207                   |
| $P$ for interaction between area and group <sup>b</sup>    | Ref.              | 0.344               | 0.127                | 0.887                   |
| $P$ for interaction between smoking and group <sup>b</sup> | Ref.              | 0.950               | 0.103                | 0.696                   |

408 <sup>a</sup> Single variance binary logistic regression model.

409 <sup>b</sup> Multivariable logistic regression model, adjusted for smoking, drinking, family economic  
 410 status and the highest education attainment of parents.

1  
2  
3  
4  
5  
6  
7  
8  
9  
10  
11  
12  
13  
14  
15  
16  
17  
18  
19  
20  
21  
22  
23  
24  
25  
26  
27  
28  
29  
30  
31  
32  
33  
34  
35  
36  
37  
38  
39  
40  
41  
42  
43  
44  
45  
46  
47  
48  
49  
50  
51  
52  
53  
54  
55  
56  
57  
58  
59  
60

411 **Fig 1.** Flowchart on the sample selecting methods at each step

412 **Figure legends**

413 \* Means missing of chronic lung diseases information in raw database.

414

For peer review only



1  
2  
3  
4  
5  
6  
7  
8  
9  
10  
11  
12  
13  
14  
15  
16  
17  
18  
19  
20  
21  
22  
23  
24  
25  
26  
27  
28  
29  
30  
31  
32  
33  
34  
35  
36  
37  
38  
39  
40  
41  
42  
43  
44  
45  
46  
47  
48  
49  
50  
51  
52  
53  
54  
55  
56  
57  
58  
59  
60

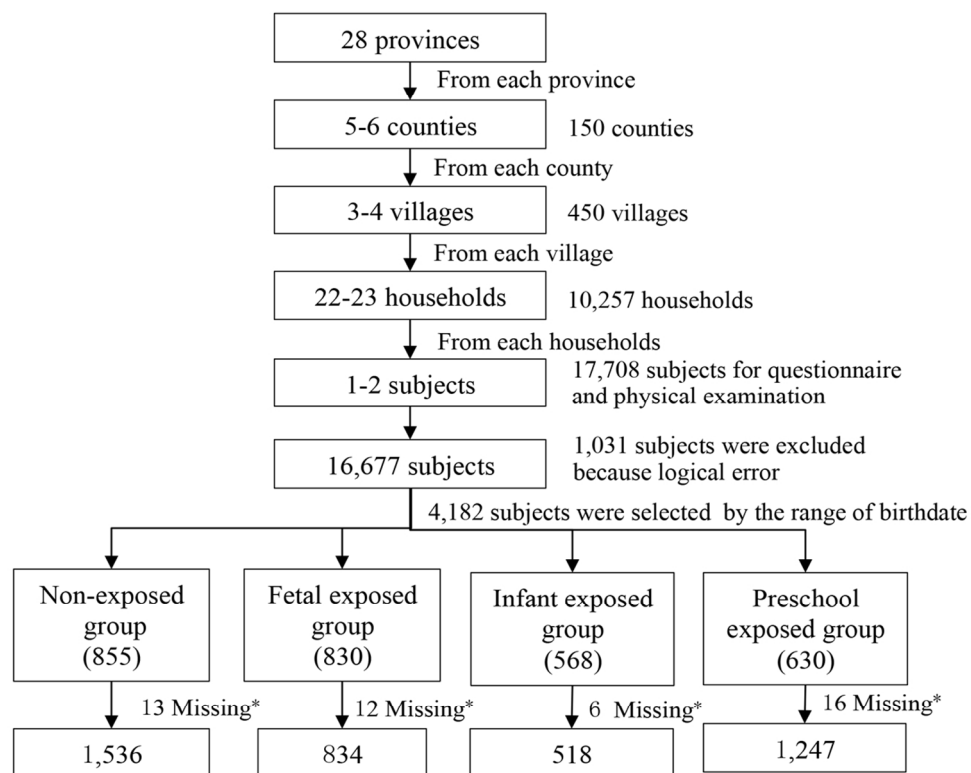

Fig 1. Flowchart on the sample selecting methods at each step

114x93mm (300 x 300 DPI)

**Supplementary Table 1** The effects of smoking, drinking, family economic status and parents' education attainment on the prevalence rates of chronic lung diseases

| Variances                           | <i>B</i> | <i>S.E.</i> | <i>Wald</i> | <i>df</i> | <i>P</i> | <i>Exp(B)</i> | 95% CI. for EXP (B) |       |
|-------------------------------------|----------|-------------|-------------|-----------|----------|---------------|---------------------|-------|
|                                     |          |             |             |           |          |               | Lower               | Upper |
| <b>Male</b>                         |          |             |             |           |          |               |                     |       |
| <b>Less severely affected areas</b> |          |             |             |           |          |               |                     |       |
| Groups                              |          |             | 2.157       | 3         | 0.540    |               |                     |       |
| Fetal-exposed                       | 0.245    | 0.447       | 0.300       | 1         | 0.584    | 1.277         | 0.532               | 3.067 |
| Infant-exposed                      | 0.600    | 0.445       | 1.815       | 1         | 0.178    | 1.822         | 0.761               | 4.362 |
| Preschool-exposed                   | 0.083    | 0.446       | 0.034       | 1         | 0.853    | 1.086         | 0.453               | 2.603 |
| Smoking                             | 0.141    | 0.193       | 0.532       | 1         | 0.466    | 1.151         | 0.789               | 1.681 |
| Drinking                            | -0.124   | 0.166       | 0.557       | 1         | 0.456    | 0.883         | 0.638               | 1.224 |
| Parents' education attainment       | -0.133   | 0.363       | 0.134       | 1         | 0.714    | 0.876         | 0.430               | 1.783 |
| Family economic status              | -0.131   | 0.347       | 0.143       | 1         | 0.706    | 0.877         | 0.444               | 1.733 |
| Constant                            | -2.579   | 0.786       | 10.779      | 1         | 0.001    | 0.076         |                     |       |
| <b>Severely affected areas</b>      |          |             |             |           |          |               |                     |       |
| Groups                              |          |             | 8.343       | 3         | 0.039    |               |                     |       |
| Fetal-exposed                       | -0.285   | 0.684       | 0.174       | 1         | 0.677    | 0.752         | 0.197               | 2.872 |
| Infant-exposed                      | 1.150    | 0.506       | 5.175       | 1         | 0.023    | 3.158         | 1.173               | 8.508 |
| Preschool-exposed                   | -0.207   | 0.513       | 0.163       | 1         | 0.686    | 0.813         | 0.297               | 2.221 |
| Smoking                             | 0.188    | 0.243       | 0.595       | 1         | 0.441    | 1.206         | 0.749               | 1.943 |
| Drinking                            | -0.192   | 0.215       | 0.801       | 1         | 0.371    | 0.825         | 0.541               | 1.257 |
| Parents' education attainment       | 0.217    | 0.472       | 0.211       | 1         | 0.646    | 1.242         | 0.492               | 3.136 |
| Family economic status              | 0.306    | 0.521       | 0.346       | 1         | 0.556    | 1.359         | 0.489               | 3.772 |
| Constant                            | -3.075   | 1.028       | 8.939       | 1         | 0.003    | 0.046         |                     |       |
| <b>Female</b>                       |          |             |             |           |          |               |                     |       |
| <b>Less severely affected areas</b> |          |             |             |           |          |               |                     |       |
| Groups                              |          |             | 2.448       | 3         | 0.485    |               |                     |       |
| Fetal-exposed                       | 0.440    | 0.373       | 1.392       | 1         | 0.238    | 1.553         | 0.747               | 3.226 |
| Infant-exposed                      | -0.268   | 0.581       | 0.214       | 1         | 0.644    | 0.765         | 0.245               | 2.386 |
| Preschool-exposed                   | 0.339    | 0.369       | 0.841       | 1         | 0.359    | 1.403         | 0.680               | 2.893 |
| Smoking                             | 0.290    | 0.259       | 1.251       | 1         | 0.263    | 1.336         | 0.804               | 2.219 |
| Drinking                            | 0.038    | 0.264       | 0.020       | 1         | 0.886    | 1.038         | 0.620               | 1.741 |
| Parents' education attainment       | 0.301    | 0.221       | 1.842       | 1         | 0.175    | 1.351         | 0.875               | 2.085 |
| Family economic status              | -0.351   | 0.401       | 0.768       | 1         | 0.381    | 0.704         | 0.321               | 1.543 |
| Constant                            | -3.352   | 0.562       | 35.558      | 1         | 0        | 0.035         |                     |       |
| <b>Severely affected areas</b>      |          |             |             |           |          |               |                     |       |
| Groups                              |          |             | 3.288       | 3         | 0.349    |               |                     |       |
| Fetal-exposed                       | 0.329    | 0.505       | 0.425       | 1         | 0.514    | 1.390         | 0.516               | 3.742 |
| Infant-exposed                      | 0.682    | 0.542       | 1.583       | 1         | 0.208    | 1.977         | 0.684               | 5.717 |
| Preschool-exposed                   | -0.395   | 0.558       | 0.501       | 1         | 0.479    | 0.674         | 0.226               | 2.011 |
| Smoking                             | 0.337    | 0.584       | 0.333       | 1         | 0.564    | 1.401         | 0.446               | 4.396 |
| Drinking                            | -0.380   | 0.421       | 0.813       | 1         | 0.367    | 0.684         | 0.300               | 1.562 |
| Parents' education attainment       | 0.224    | 0.286       | 0.616       | 1         | 0.433    | 1.252         | 0.715               | 2.192 |
| Family economic status              | 0.355    | 0.422       | 0.710       | 1         | 0.399    | 1.427         | 0.624               | 3.261 |
| Constant                            | -3.045   | 0.895       | 11.59       | 1         | 0.001    | 0.048         |                     |       |

STROBE Statement—Checklist of items that should be included in reports of *cross-sectional studies*

|                              | Item No | Recommendation                                                                                                                                                                                                                                                                                                                                                                                                                                                                                                           |
|------------------------------|---------|--------------------------------------------------------------------------------------------------------------------------------------------------------------------------------------------------------------------------------------------------------------------------------------------------------------------------------------------------------------------------------------------------------------------------------------------------------------------------------------------------------------------------|
| <b>Title and abstract</b>    | 1       | (a) Indicate the study's design with a commonly used term in the title or the abstract<br>(b) Provide in the abstract an informative and balanced summary of what was done and what was found<br><i>Please see page 1, the title and abstract.</i>                                                                                                                                                                                                                                                                       |
| <b>Introduction</b>          |         |                                                                                                                                                                                                                                                                                                                                                                                                                                                                                                                          |
| Background/rationale         | 2       | Explain the scientific background and rationale for the investigation being reported<br><i>Please see page 4-5, the first three paragraphs of the "Introduction" section.</i>                                                                                                                                                                                                                                                                                                                                            |
| Objectives                   | 3       | State specific objectives, including any prespecified hypotheses<br><i>Please see page 5, the last paragraph of the "Introduction" section.</i>                                                                                                                                                                                                                                                                                                                                                                          |
| <b>Methods</b>               |         |                                                                                                                                                                                                                                                                                                                                                                                                                                                                                                                          |
| Study design                 | 4       | Present key elements of study design early in the paper<br><i>Please see page 5-6, the "Sampling and participants" section.</i>                                                                                                                                                                                                                                                                                                                                                                                          |
| Setting                      | 5       | Describe the setting, locations, and relevant dates, including periods of recruitment, exposure, follow-up, and data collection<br><i>Please see page 5-6, the "Sampling and participants" section.</i>                                                                                                                                                                                                                                                                                                                  |
| Participants                 | 6       | (a) Give the eligibility criteria, and the sources and methods of selection of participants<br><i>Please see page 6, the "Sampling and grouping" section.</i>                                                                                                                                                                                                                                                                                                                                                            |
| Variables                    | 7       | Clearly define all outcomes, exposures, predictors, potential confounders, and effect modifiers. Give diagnostic criteria, if applicable<br><i>Please see page 6-7, the "Measurements" section, and the "Famine severity" section.</i>                                                                                                                                                                                                                                                                                   |
| Data sources/<br>measurement | 8*      | For each variable of interest, give sources of data and details of methods of assessment (measurement). Describe comparability of assessment methods if there is more than one group<br><i>Please see page 6-7, the "Measurements" section, and the "Famine severity" section.</i>                                                                                                                                                                                                                                       |
| Bias                         | 9       | Describe any efforts to address potential sources of bias<br><i>Please see page 7, the "Diagnosis of chronic lung diseases" section.</i>                                                                                                                                                                                                                                                                                                                                                                                 |
| Study size                   | 10      | Explain how the study size was arrived at<br><i>Please see page 5-6, the "Sampling and participants" section.</i>                                                                                                                                                                                                                                                                                                                                                                                                        |
| Quantitative variables       | 11      | Explain how quantitative variables were handled in the analyses. If applicable, describe which groupings were chosen and why<br><i>Please see page 6-7, the "Assessment of covariates" section.</i>                                                                                                                                                                                                                                                                                                                      |
| Statistical methods          | 12      | (a) Describe all statistical methods, including those used to control for confounding<br><i>Please see page 8-9, the "Analysis" section.</i><br>(b) Describe any methods used to examine subgroups and interactions<br><i>Please see page 8-9, the third paragraph of "Analysis" section.</i><br>(c) Explain how missing data were addressed<br><i>N/A.</i><br>(d) If applicable, describe analytical methods taking account of sampling strategy<br><i>N/A.</i><br>(e) Describe any sensitivity analyses<br><i>N/A.</i> |
| <b>Results</b>               |         |                                                                                                                                                                                                                                                                                                                                                                                                                                                                                                                          |
| Participants                 | 13*     | (a) Report numbers of individuals at each stage of study—eg numbers potentially                                                                                                                                                                                                                                                                                                                                                                                                                                          |

|                          |     |                                                                                                                                                                                                                                                                                                                                                                                                                                                                                                                                                                                               |
|--------------------------|-----|-----------------------------------------------------------------------------------------------------------------------------------------------------------------------------------------------------------------------------------------------------------------------------------------------------------------------------------------------------------------------------------------------------------------------------------------------------------------------------------------------------------------------------------------------------------------------------------------------|
|                          |     | eligible, examined for eligibility, confirmed eligible, included in the study, completing follow-up, and analysed<br><a href="#">Please see page 5-6, the “Sampling and participants” section.</a>                                                                                                                                                                                                                                                                                                                                                                                            |
|                          |     | (b) Give reasons for non-participation at each stage<br>N/A.                                                                                                                                                                                                                                                                                                                                                                                                                                                                                                                                  |
|                          |     | (c) Consider use of a flow diagram<br><a href="#">Please see page 21. The Fig 1.</a>                                                                                                                                                                                                                                                                                                                                                                                                                                                                                                          |
| Descriptive data         | 14* | (a) Give characteristics of study participants (eg demographic, clinical, social) and information on exposures and potential confounders<br><a href="#">Please see page 18, Table 1.</a><br>(b) Indicate number of participants with missing data for each variable of interest<br>N/A.                                                                                                                                                                                                                                                                                                       |
| Outcome data             | 15* | Report numbers of outcome events or summary measures<br><a href="#">Please see page 18, Table 1.</a>                                                                                                                                                                                                                                                                                                                                                                                                                                                                                          |
| Main results             | 16  | (a) Give unadjusted estimates and, if applicable, confounder-adjusted estimates and their precision (eg, 95% confidence interval). Make clear which confounders were adjusted for and why they were included<br><a href="#">Please see page 19-20, Table 2-3.</a><br>(b) Report category boundaries when continuous variables were categorized<br><a href="#">Please see page 6-8, the “Famine severity” section, and the “Assessment of covariates” section.</a><br>(c) If relevant, consider translating estimates of relative risk into absolute risk for a meaningful time period<br>N/A. |
| Other analyses           | 17  | Report other analyses done—eg analyses of subgroups and interactions, and sensitivity analyses<br><a href="#">Please see page 20, Table 3.</a>                                                                                                                                                                                                                                                                                                                                                                                                                                                |
| <b>Discussion</b>        |     |                                                                                                                                                                                                                                                                                                                                                                                                                                                                                                                                                                                               |
| Key results              | 18  | Summarise key results with reference to study objectives<br><a href="#">Please see page 11, the first paragraph of the “Discussion”.</a>                                                                                                                                                                                                                                                                                                                                                                                                                                                      |
| Limitations              | 19  | Discuss limitations of the study, taking into account sources of potential bias or imprecision. Discuss both direction and magnitude of any potential bias<br><a href="#">Please see page 13, the last paragraph of the “Discussion”.</a>                                                                                                                                                                                                                                                                                                                                                     |
| Interpretation           | 20  | Give a cautious overall interpretation of results considering objectives, limitations, multiplicity of analyses, results from similar studies, and other relevant evidence<br><a href="#">Please see page 11-13, in the “Discussion”.</a>                                                                                                                                                                                                                                                                                                                                                     |
| Generalisability         | 21  | Discuss the generalisability (external validity) of the study results<br>N/A.                                                                                                                                                                                                                                                                                                                                                                                                                                                                                                                 |
| <b>Other information</b> |     |                                                                                                                                                                                                                                                                                                                                                                                                                                                                                                                                                                                               |
| Funding                  | 22  | Give the source of funding and the role of the funders for the present study and, if applicable, for the original study on which the present article is based<br><a href="#">Please see page 14, in the “Funding” section.</a>                                                                                                                                                                                                                                                                                                                                                                |

\*Give information separately for exposed and unexposed groups.

**Note:** An Explanation and Elaboration article discusses each checklist item and gives methodological background and published examples of transparent reporting. The STROBE checklist is best used in conjunction with this article (freely

1  
2 available on the Web sites of PLoS Medicine at <http://www.plosmedicine.org/>, Annals of Internal Medicine at  
3 <http://www.annals.org/>, and Epidemiology at <http://www.epidem.com/>). Information on the STROBE Initiative is  
4 available at [www.strobe-statement.org](http://www.strobe-statement.org).  
5  
6  
7  
8  
9  
10  
11  
12  
13  
14  
15  
16  
17  
18  
19  
20  
21  
22  
23  
24  
25  
26  
27  
28  
29  
30  
31  
32  
33  
34  
35  
36  
37  
38  
39  
40  
41  
42  
43  
44  
45  
46  
47  
48  
49  
50  
51  
52  
53  
54  
55  
56  
57  
58  
59  
60

For peer review only
