# Supplementary material for: Association between exposure to the Chinese famine during infancy and the risk of self-reported chronic lung diseases in adulthood: a cross-sectional study
Source: PubMed Central journal article supplement — BMJ Open. 2017 Jun 2;7(5):e015476. doi: 10.1136/bmjopen-2016-015476 (PMC5623412; doi:10.1136/bmjopen-2016-015476), 2017-06-02
Supplement: bmjopen-2016-015476supp001.pdf [file bmjopen-2016-015476supp001.pdf]

**Supplementary Table 1** The effects of smoking, drinking, family economic status and parents' education attainment on the prevalence rates of chronic lung diseases

| Variances                           | <i>B</i> | <i>S.E.</i> | <i>Wald</i> | <i>df</i> | <i>P</i> | <i>Exp(B)</i> | 95% CI. for EXP (B) |       |
|-------------------------------------|----------|-------------|-------------|-----------|----------|---------------|---------------------|-------|
|                                     |          |             |             |           |          |               | Lower               | Upper |
| <b>Male</b>                         |          |             |             |           |          |               |                     |       |
| <b>Less severely affected areas</b> |          |             |             |           |          |               |                     |       |
| Groups                              |          |             | 2.157       | 3         | 0.540    |               |                     |       |
| Fetal-exposed                       | 0.245    | 0.447       | 0.300       | 1         | 0.584    | 1.277         | 0.532               | 3.067 |
| Infant-exposed                      | 0.600    | 0.445       | 1.815       | 1         | 0.178    | 1.822         | 0.761               | 4.362 |
| Preschool-exposed                   | 0.083    | 0.446       | 0.034       | 1         | 0.853    | 1.086         | 0.453               | 2.603 |
| Smoking                             | 0.141    | 0.193       | 0.532       | 1         | 0.466    | 1.151         | 0.789               | 1.681 |
| Drinking                            | -0.124   | 0.166       | 0.557       | 1         | 0.456    | 0.883         | 0.638               | 1.224 |
| Parents' education attainment       | -0.133   | 0.363       | 0.134       | 1         | 0.714    | 0.876         | 0.430               | 1.783 |
| Family economic status              | -0.131   | 0.347       | 0.143       | 1         | 0.706    | 0.877         | 0.444               | 1.733 |
| Constant                            | -2.579   | 0.786       | 10.779      | 1         | 0.001    | 0.076         |                     |       |
| <b>Severely affected areas</b>      |          |             |             |           |          |               |                     |       |
| Groups                              |          |             | 8.343       | 3         | 0.039    |               |                     |       |
| Fetal-exposed                       | -0.285   | 0.684       | 0.174       | 1         | 0.677    | 0.752         | 0.197               | 2.872 |
| Infant-exposed                      | 1.150    | 0.506       | 5.175       | 1         | 0.023    | 3.158         | 1.173               | 8.508 |
| Preschool-exposed                   | -0.207   | 0.513       | 0.163       | 1         | 0.686    | 0.813         | 0.297               | 2.221 |
| Smoking                             | 0.188    | 0.243       | 0.595       | 1         | 0.441    | 1.206         | 0.749               | 1.943 |
| Drinking                            | -0.192   | 0.215       | 0.801       | 1         | 0.371    | 0.825         | 0.541               | 1.257 |
| Parents' education attainment       | 0.217    | 0.472       | 0.211       | 1         | 0.646    | 1.242         | 0.492               | 3.136 |
| Family economic status              | 0.306    | 0.521       | 0.346       | 1         | 0.556    | 1.359         | 0.489               | 3.772 |
| Constant                            | -3.075   | 1.028       | 8.939       | 1         | 0.003    | 0.046         |                     |       |
| <b>Female</b>                       |          |             |             |           |          |               |                     |       |
| <b>Less severely affected areas</b> |          |             |             |           |          |               |                     |       |
| Groups                              |          |             | 2.448       | 3         | 0.485    |               |                     |       |
| Fetal-exposed                       | 0.440    | 0.373       | 1.392       | 1         | 0.238    | 1.553         | 0.747               | 3.226 |
| Infant-exposed                      | -0.268   | 0.581       | 0.214       | 1         | 0.644    | 0.765         | 0.245               | 2.386 |
| Preschool-exposed                   | 0.339    | 0.369       | 0.841       | 1         | 0.359    | 1.403         | 0.680               | 2.893 |
| Smoking                             | 0.290    | 0.259       | 1.251       | 1         | 0.263    | 1.336         | 0.804               | 2.219 |
| Drinking                            | 0.038    | 0.264       | 0.020       | 1         | 0.886    | 1.038         | 0.620               | 1.741 |
| Parents' education attainment       | 0.301    | 0.221       | 1.842       | 1         | 0.175    | 1.351         | 0.875               | 2.085 |
| Family economic status              | -0.351   | 0.401       | 0.768       | 1         | 0.381    | 0.704         | 0.321               | 1.543 |
| Constant                            | -3.352   | 0.562       | 35.558      | 1         | 0        | 0.035         |                     |       |
| <b>Severely affected areas</b>      |          |             |             |           |          |               |                     |       |
| Groups                              |          |             | 3.288       | 3         | 0.349    |               |                     |       |
| Fetal-exposed                       | 0.329    | 0.505       | 0.425       | 1         | 0.514    | 1.390         | 0.516               | 3.742 |
| Infant-exposed                      | 0.682    | 0.542       | 1.583       | 1         | 0.208    | 1.977         | 0.684               | 5.717 |
| Preschool-exposed                   | -0.395   | 0.558       | 0.501       | 1         | 0.479    | 0.674         | 0.226               | 2.011 |
| Smoking                             | 0.337    | 0.584       | 0.333       | 1         | 0.564    | 1.401         | 0.446               | 4.396 |
| Drinking                            | -0.380   | 0.421       | 0.813       | 1         | 0.367    | 0.684         | 0.300               | 1.562 |
| Parents' education attainment       | 0.224    | 0.286       | 0.616       | 1         | 0.433    | 1.252         | 0.715               | 2.192 |
| Family economic status              | 0.355    | 0.422       | 0.710       | 1         | 0.399    | 1.427         | 0.624               | 3.261 |
| Constant                            | -3.045   | 0.895       | 11.59       | 1         | 0.001    | 0.048         |                     |       |
